# Supplementary material for: Identification of the prognostic value of Th1/Th2 ratio and a novel prognostic signature in basal-like breast cancer
Source: PubMed Central journal article supplement (PMC9875389; doi:10.1186/s41065-023-00265-0), 2023-01-25

# S1. Cytokine-cytokine receptor interaction pathway

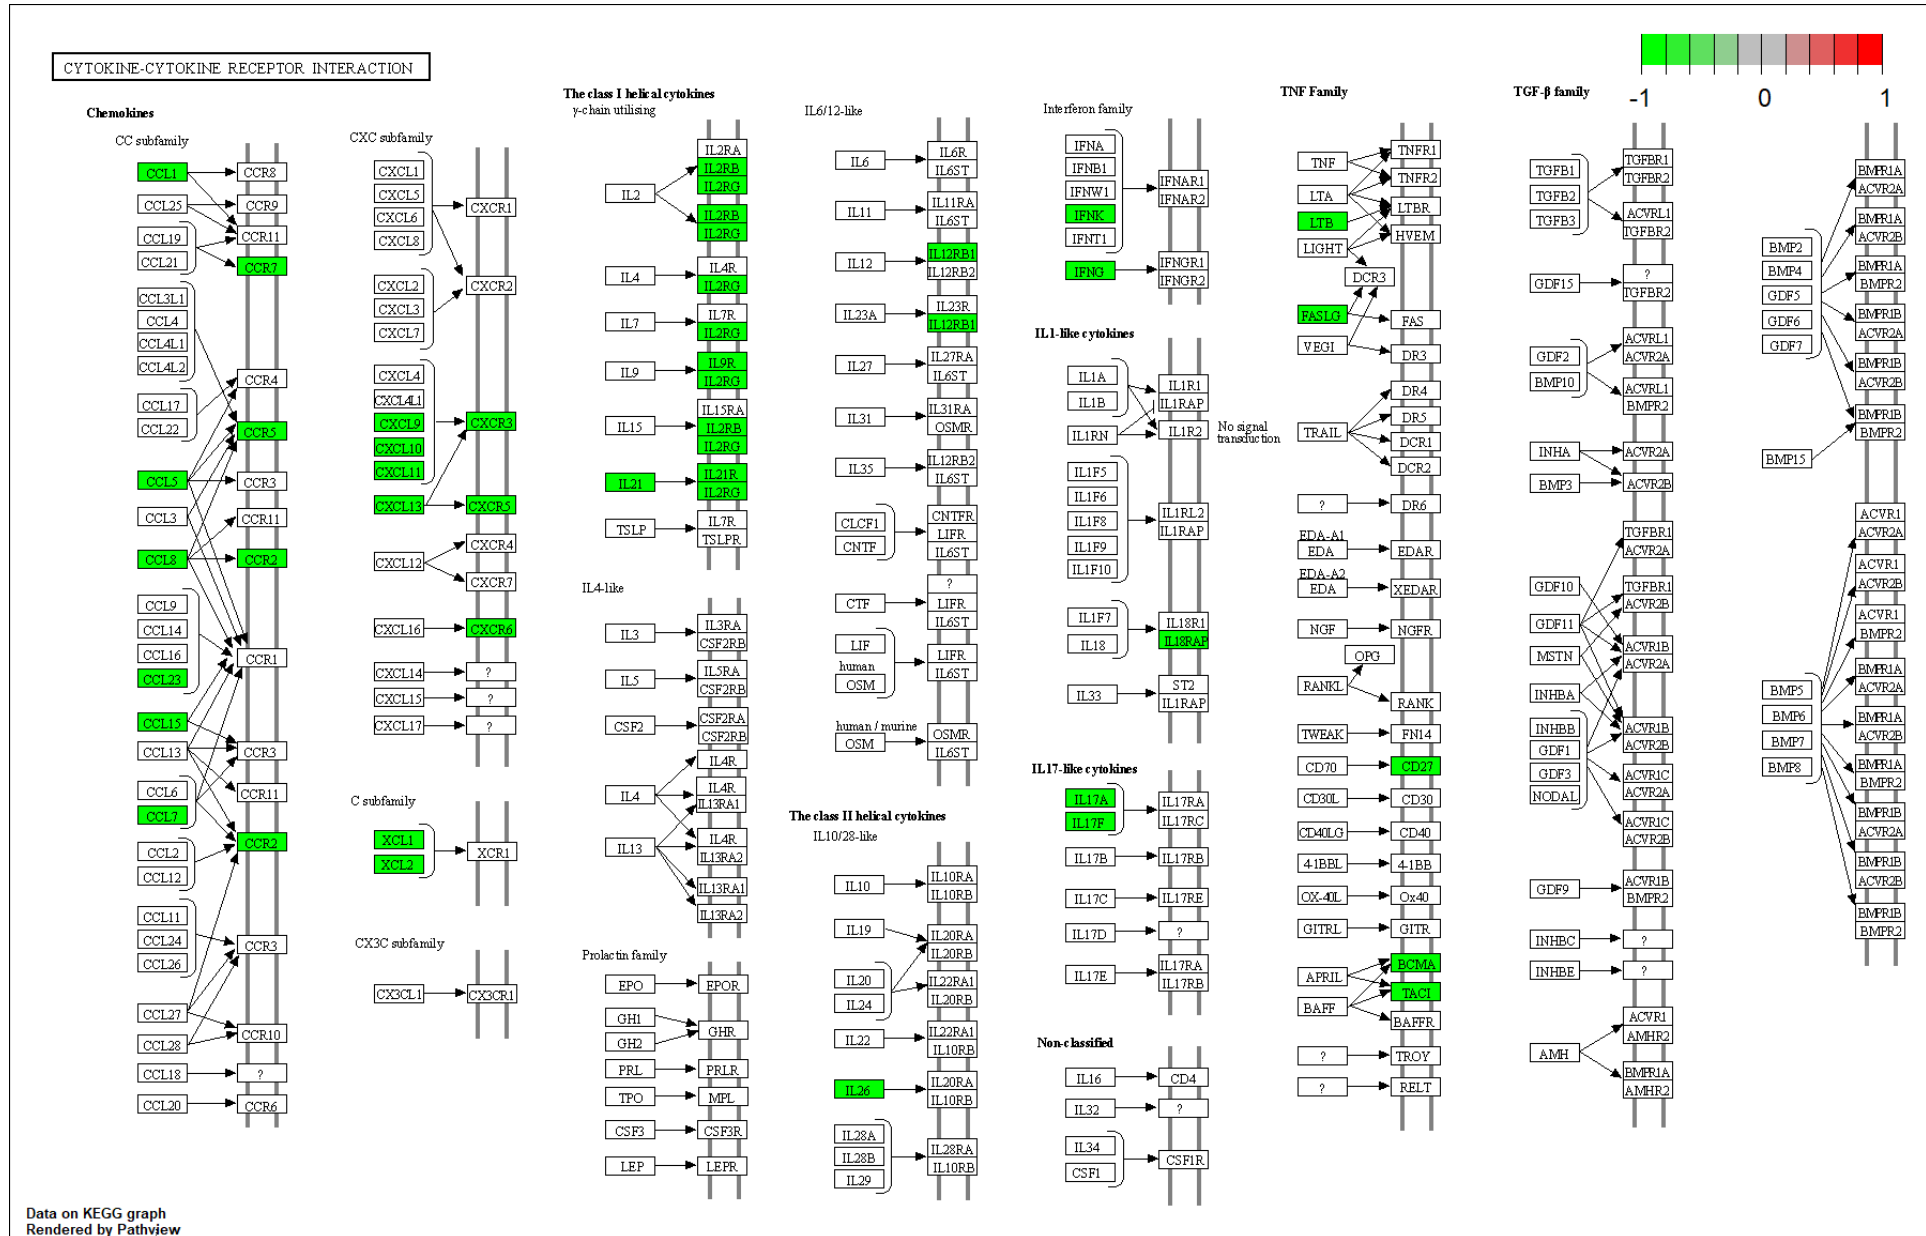



### S3. Chemokine signaling pathway

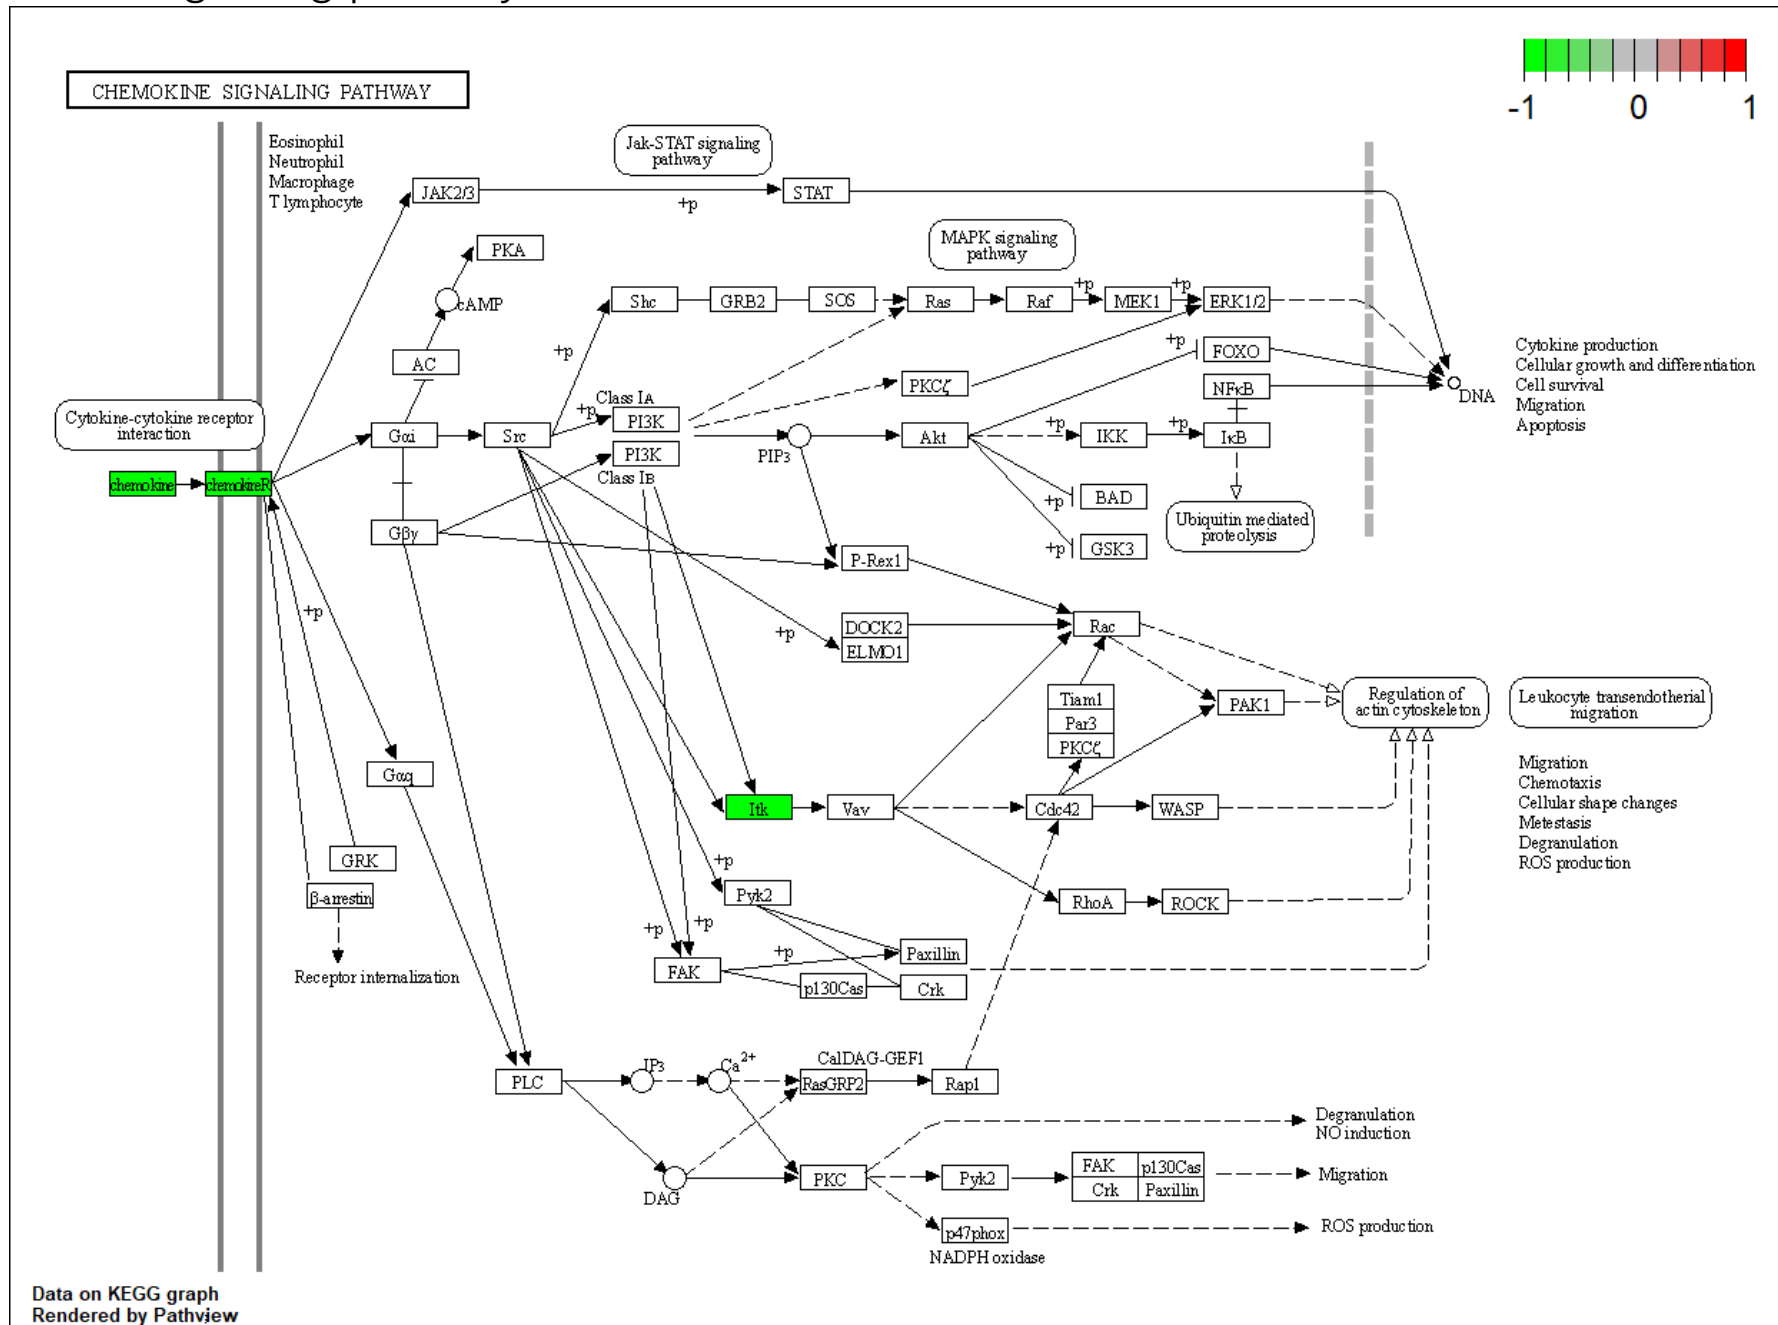

# S4. Cell adhesion molecules pathway

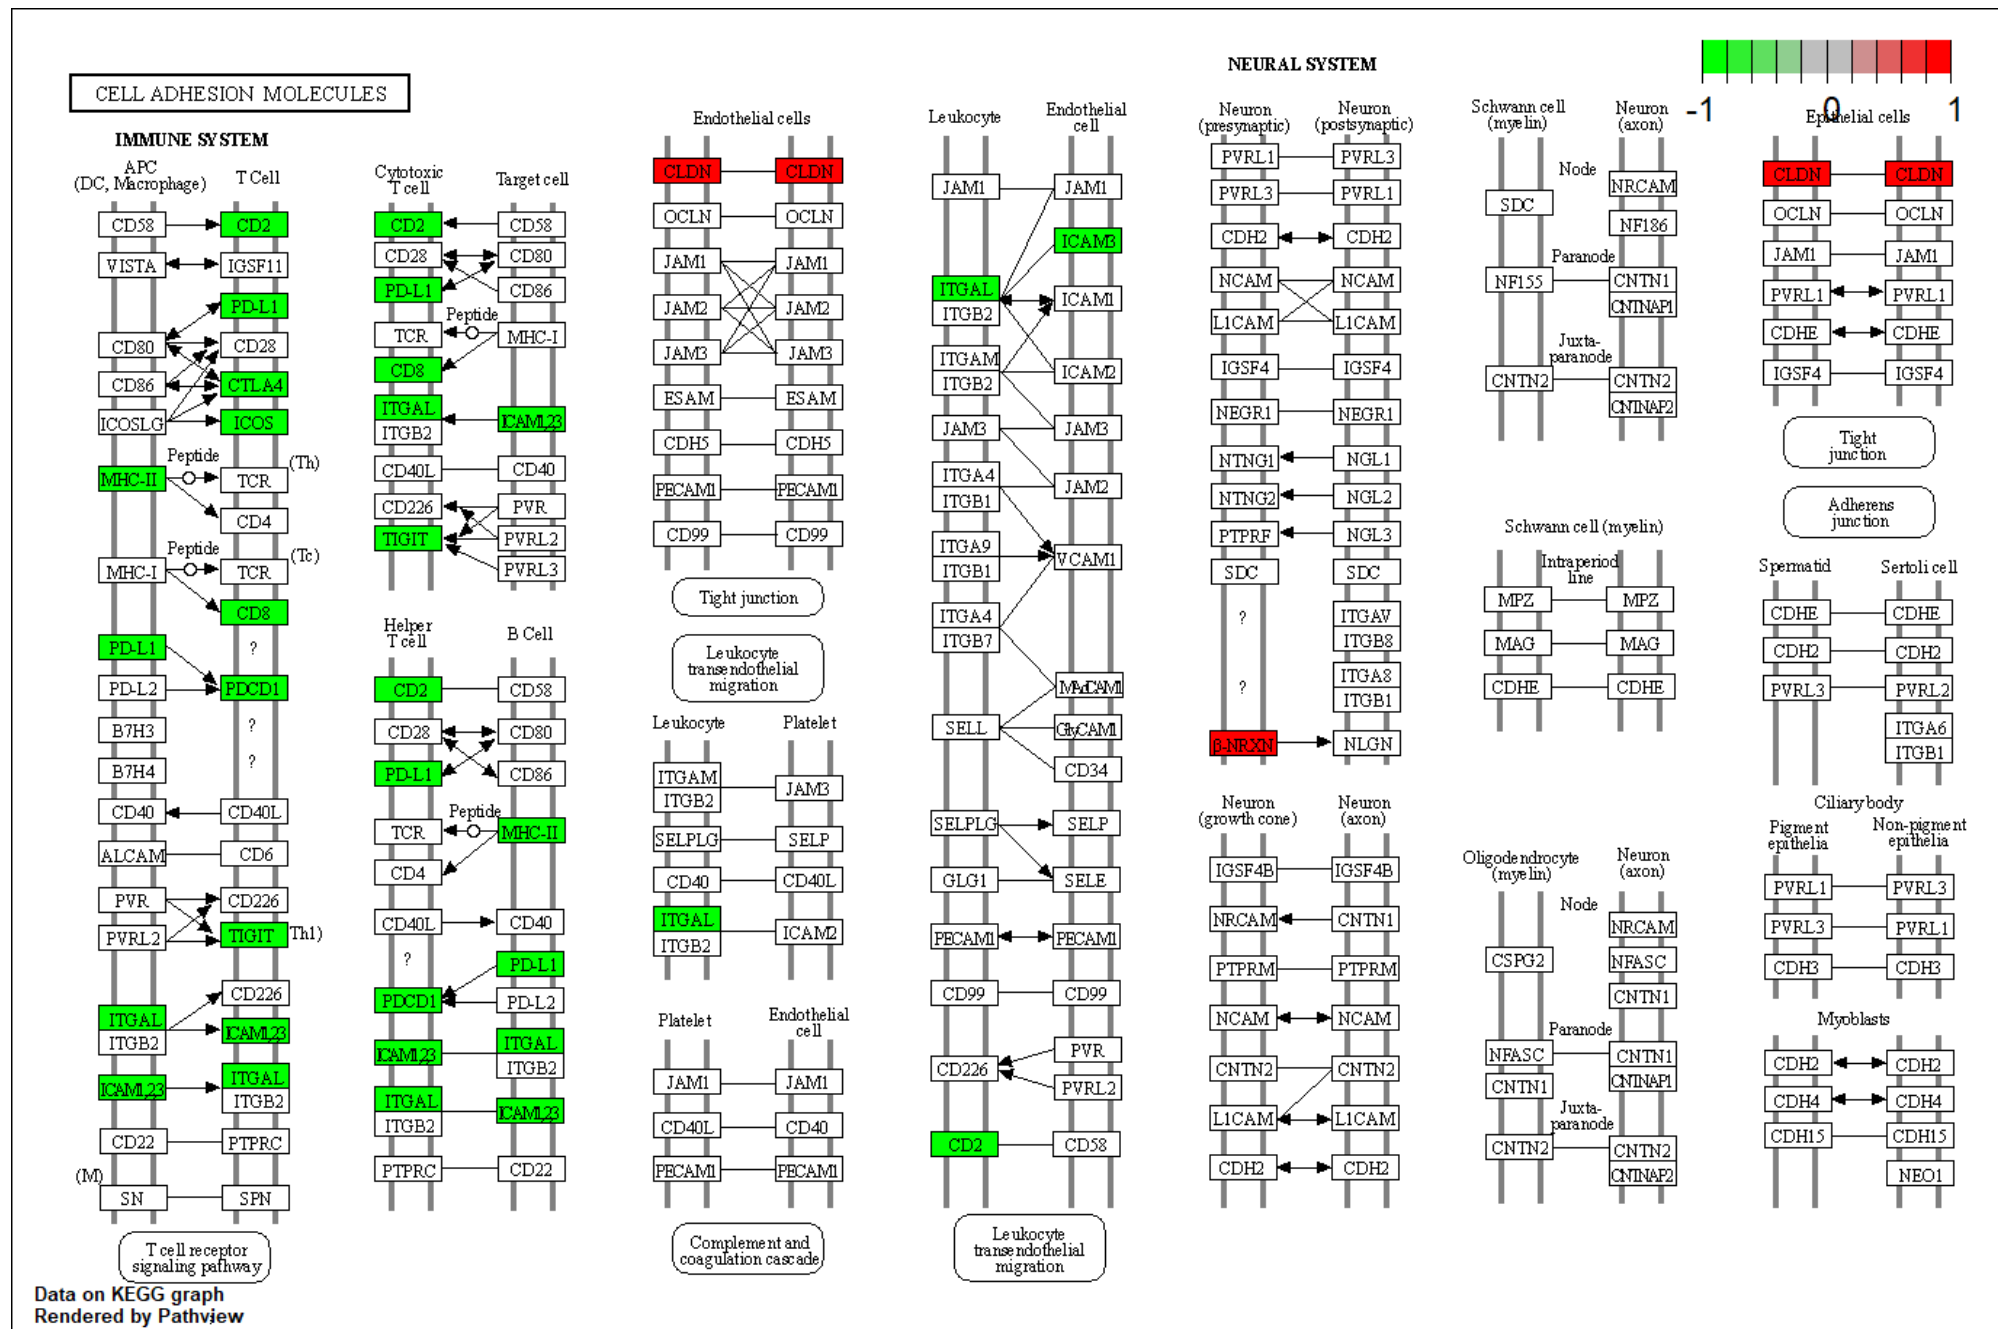

# S5. Antigen processing and presentation pathway

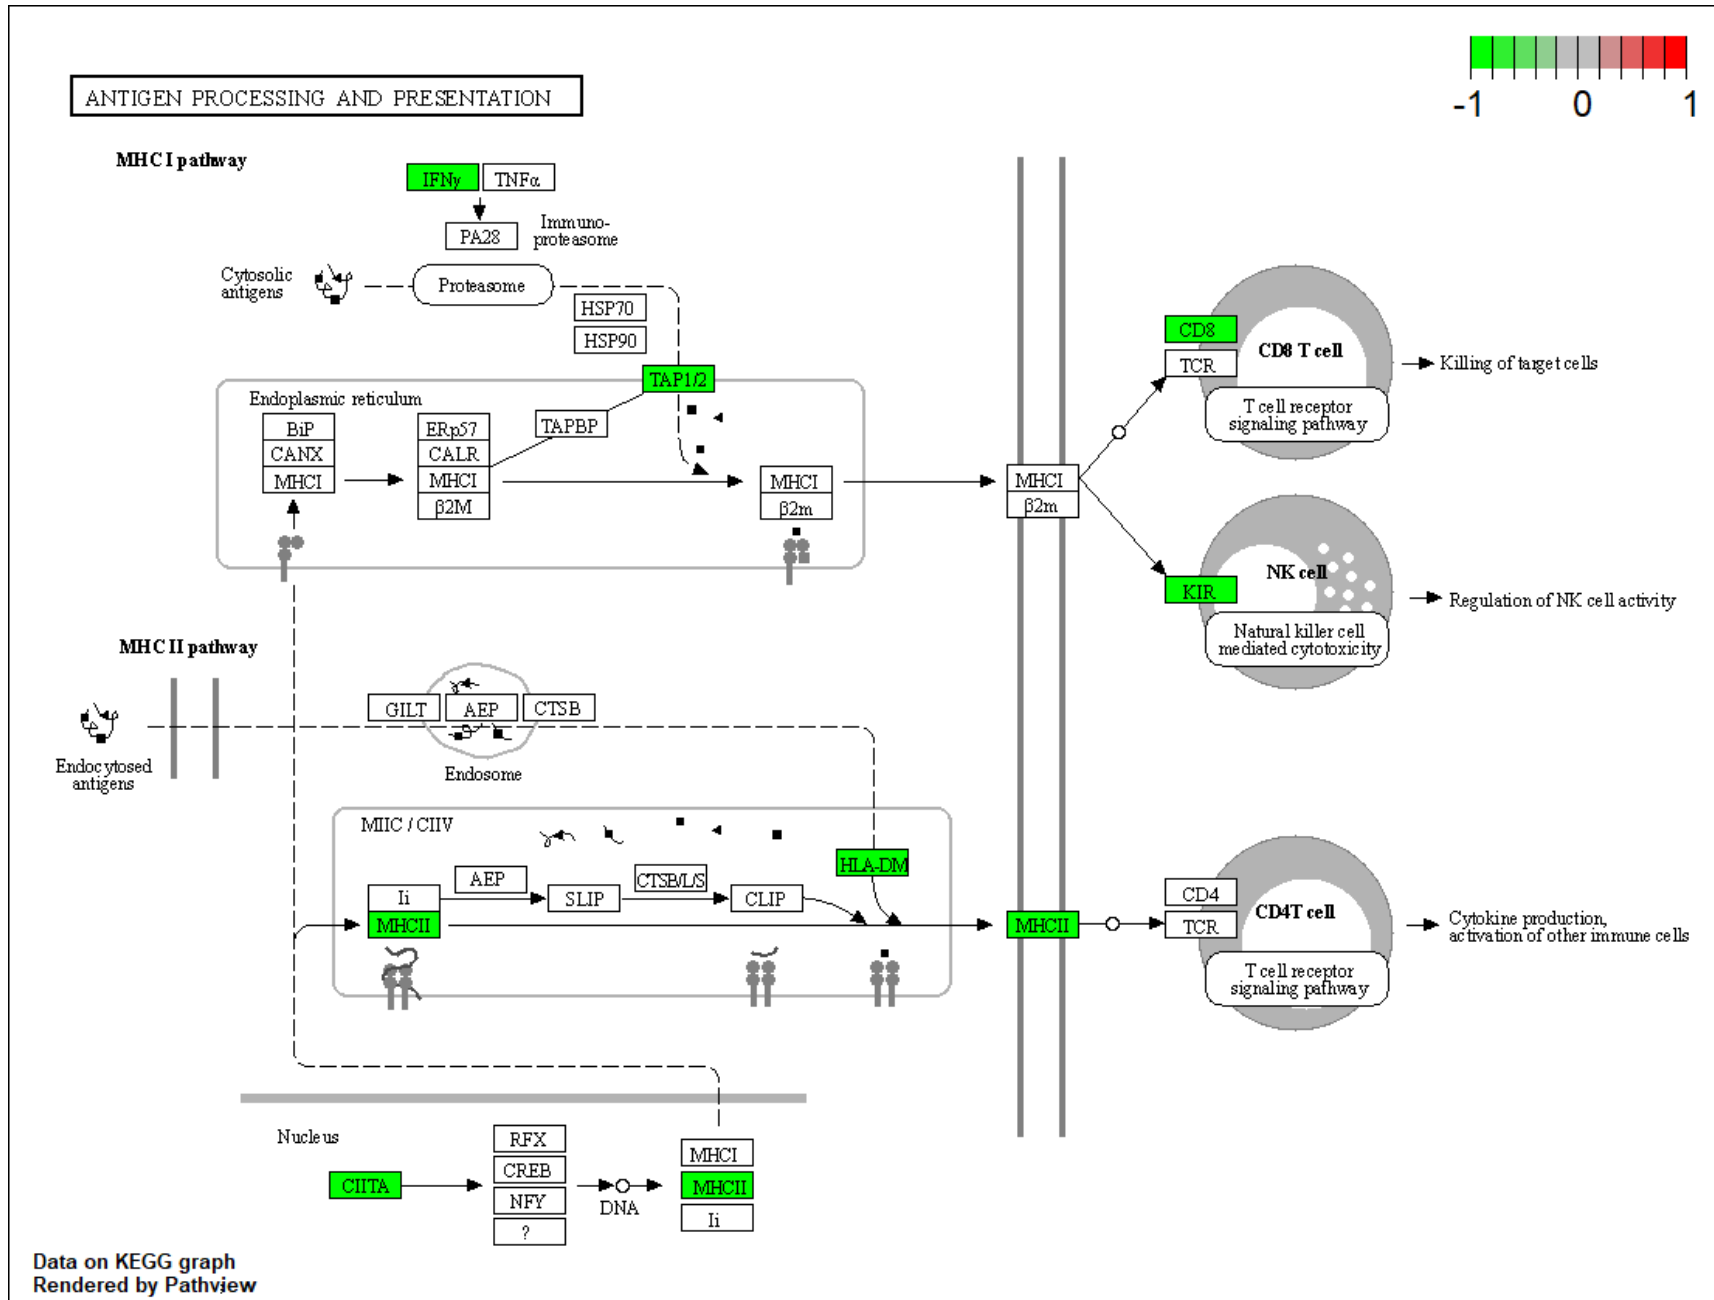

# S6. Jak-stat signaling pathway

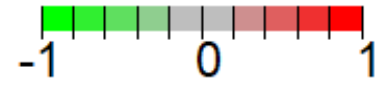

JAK-STAT SIGNALING PATHWAY

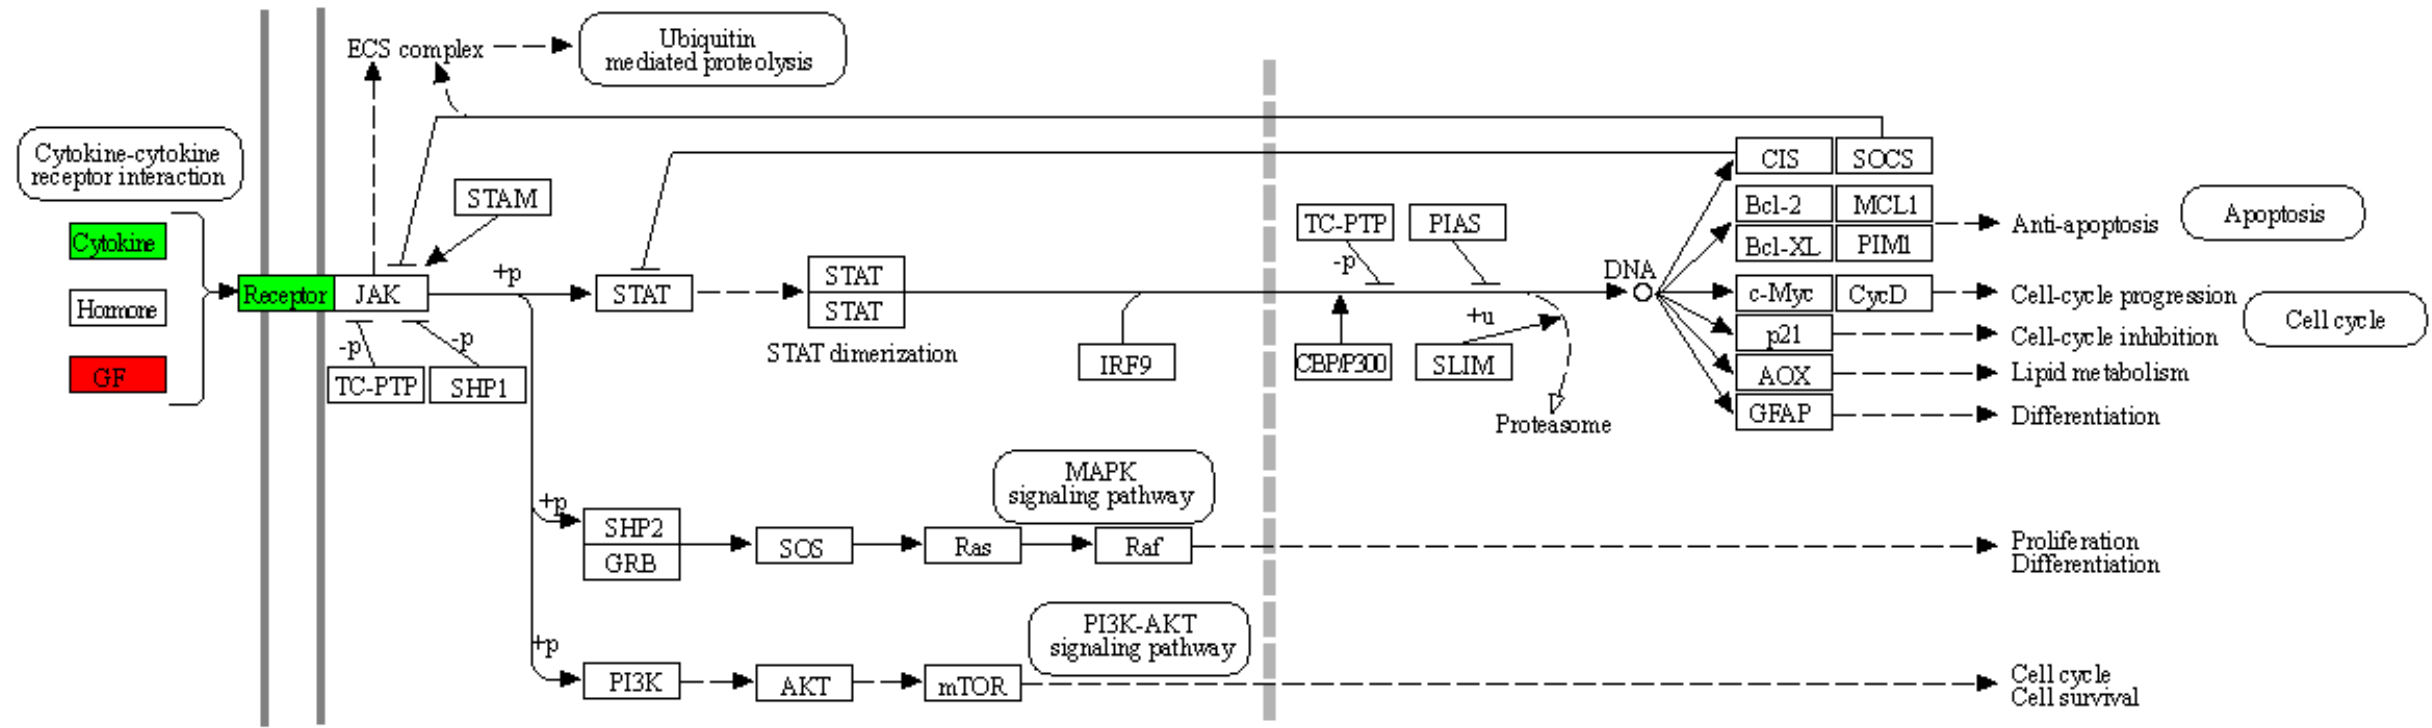

Data on KEGG graph  
Rendered by Pathview







# S9. Th1 and Th2 cell differentiation pathway

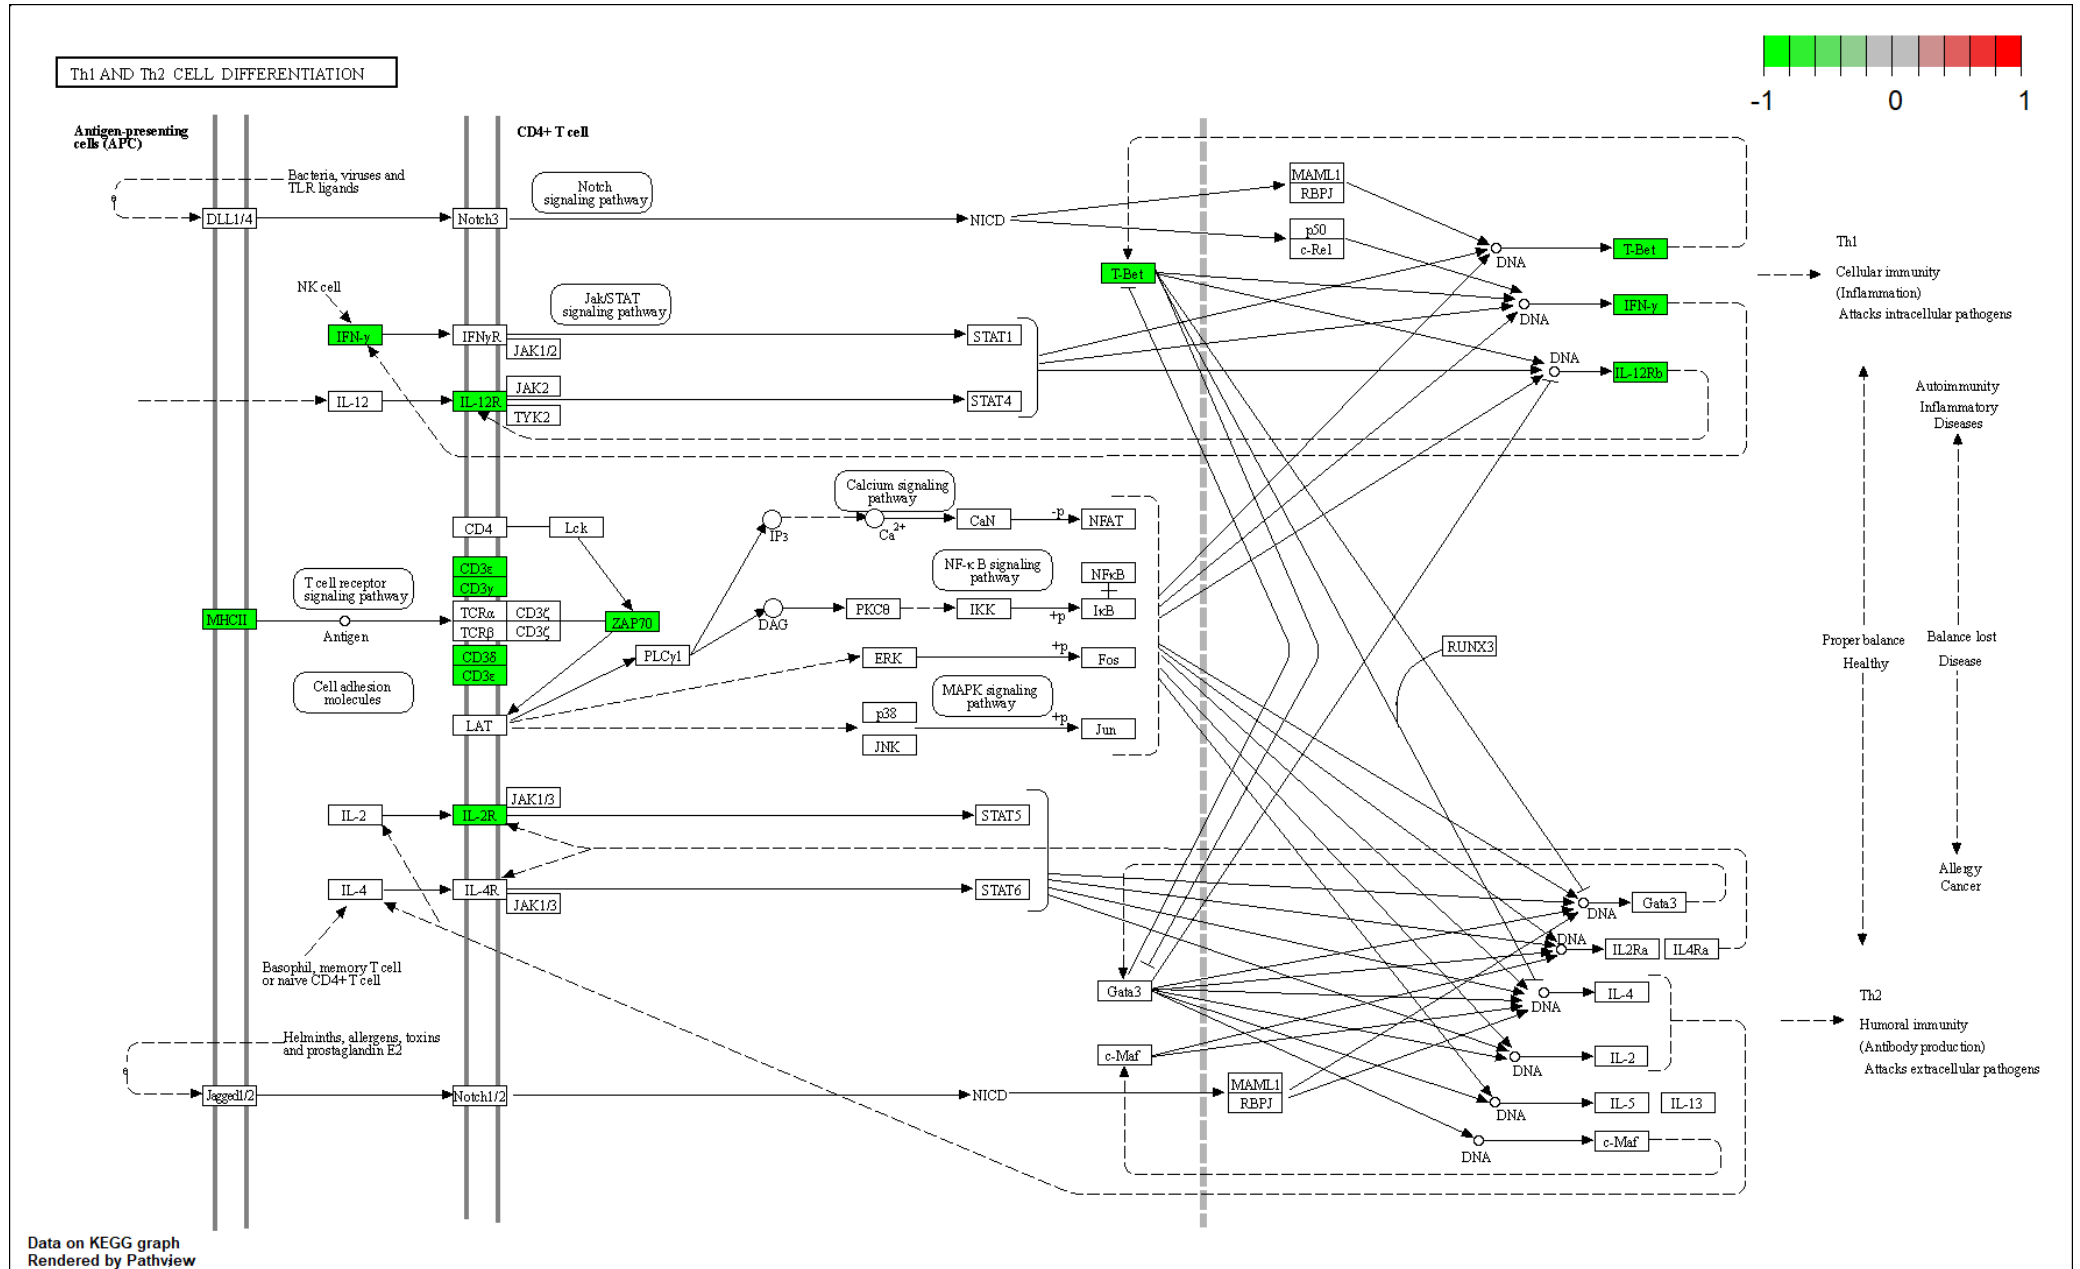

# S10. Th17 cell differentiation pathway

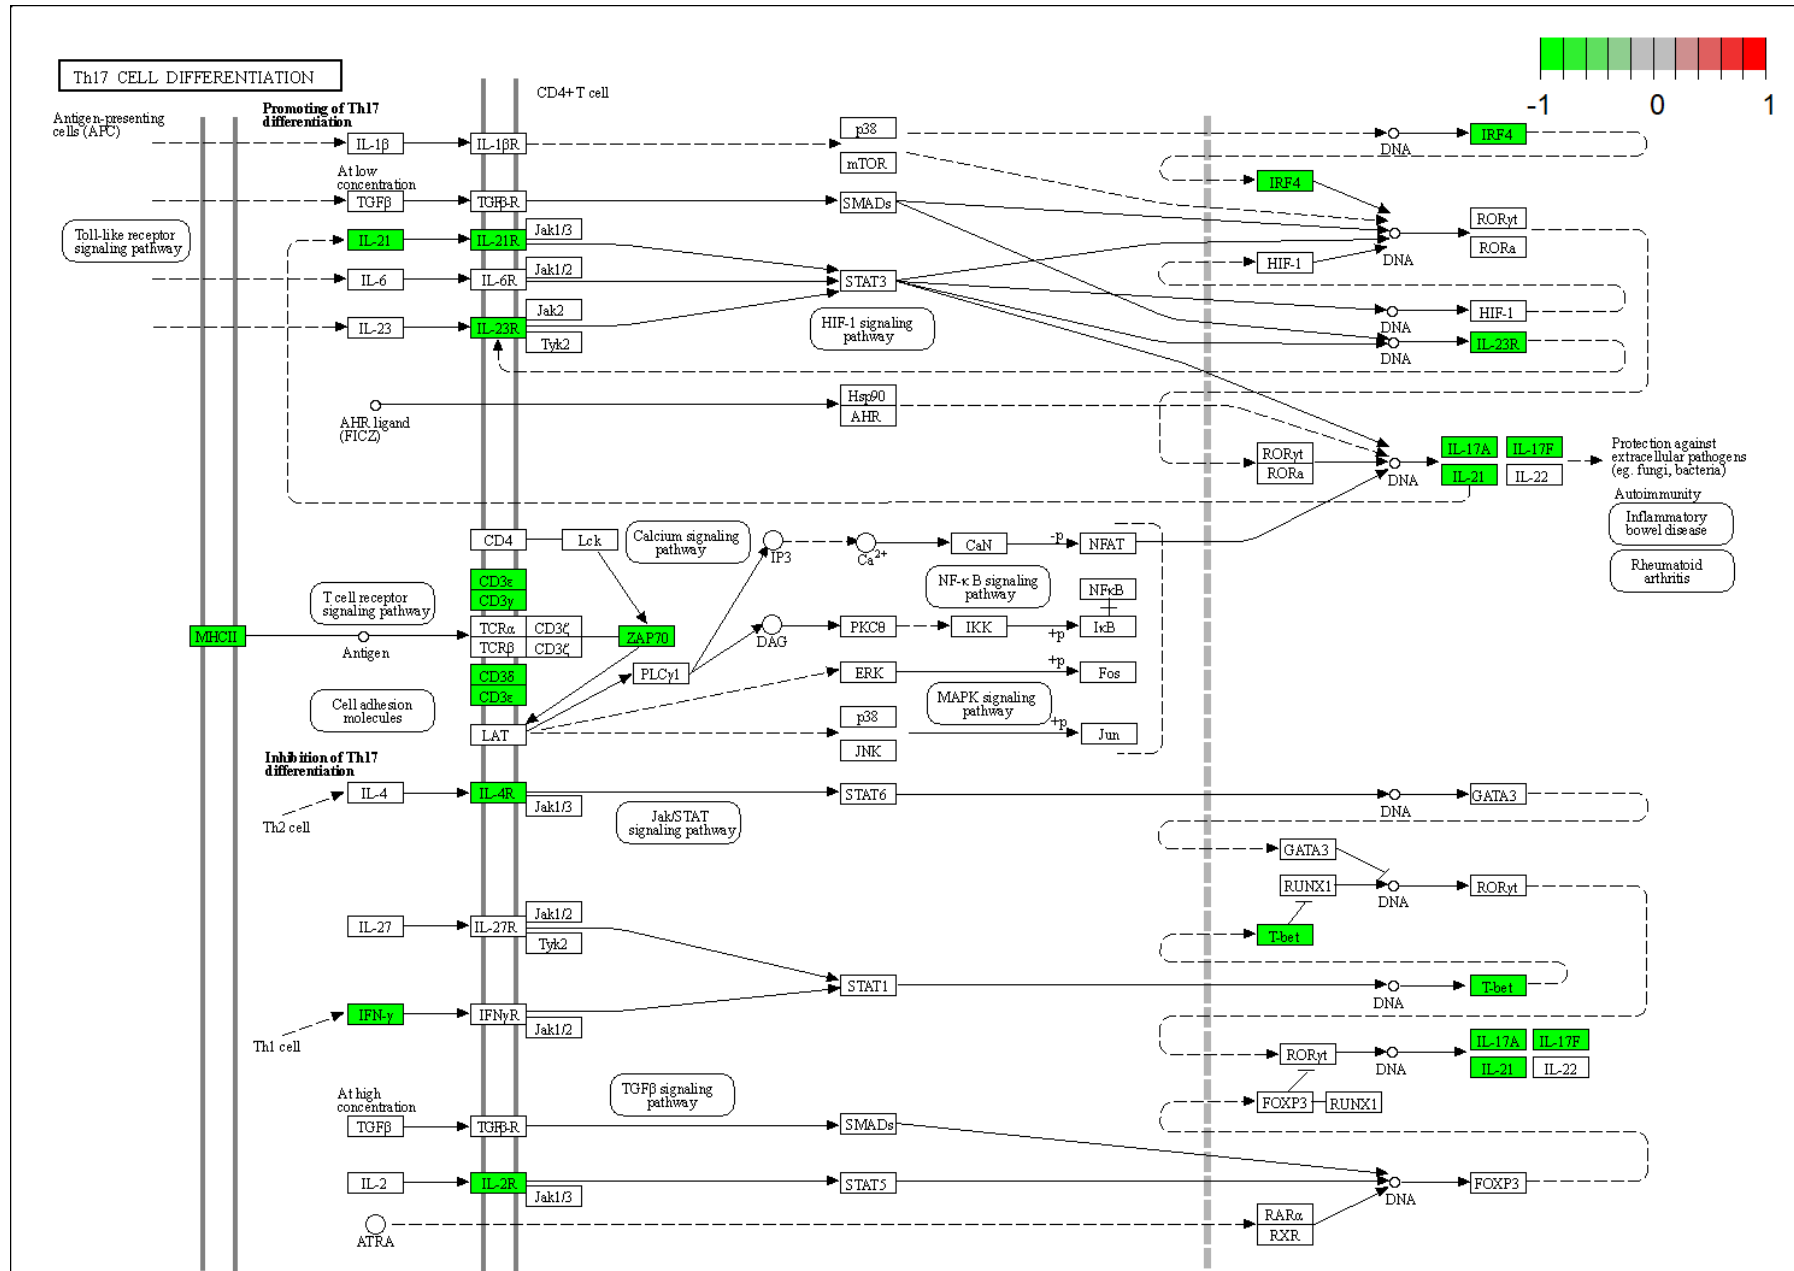

Data on KEGG graph  
Rendered by Pathview

# S11. T cell receptor signaling pathway

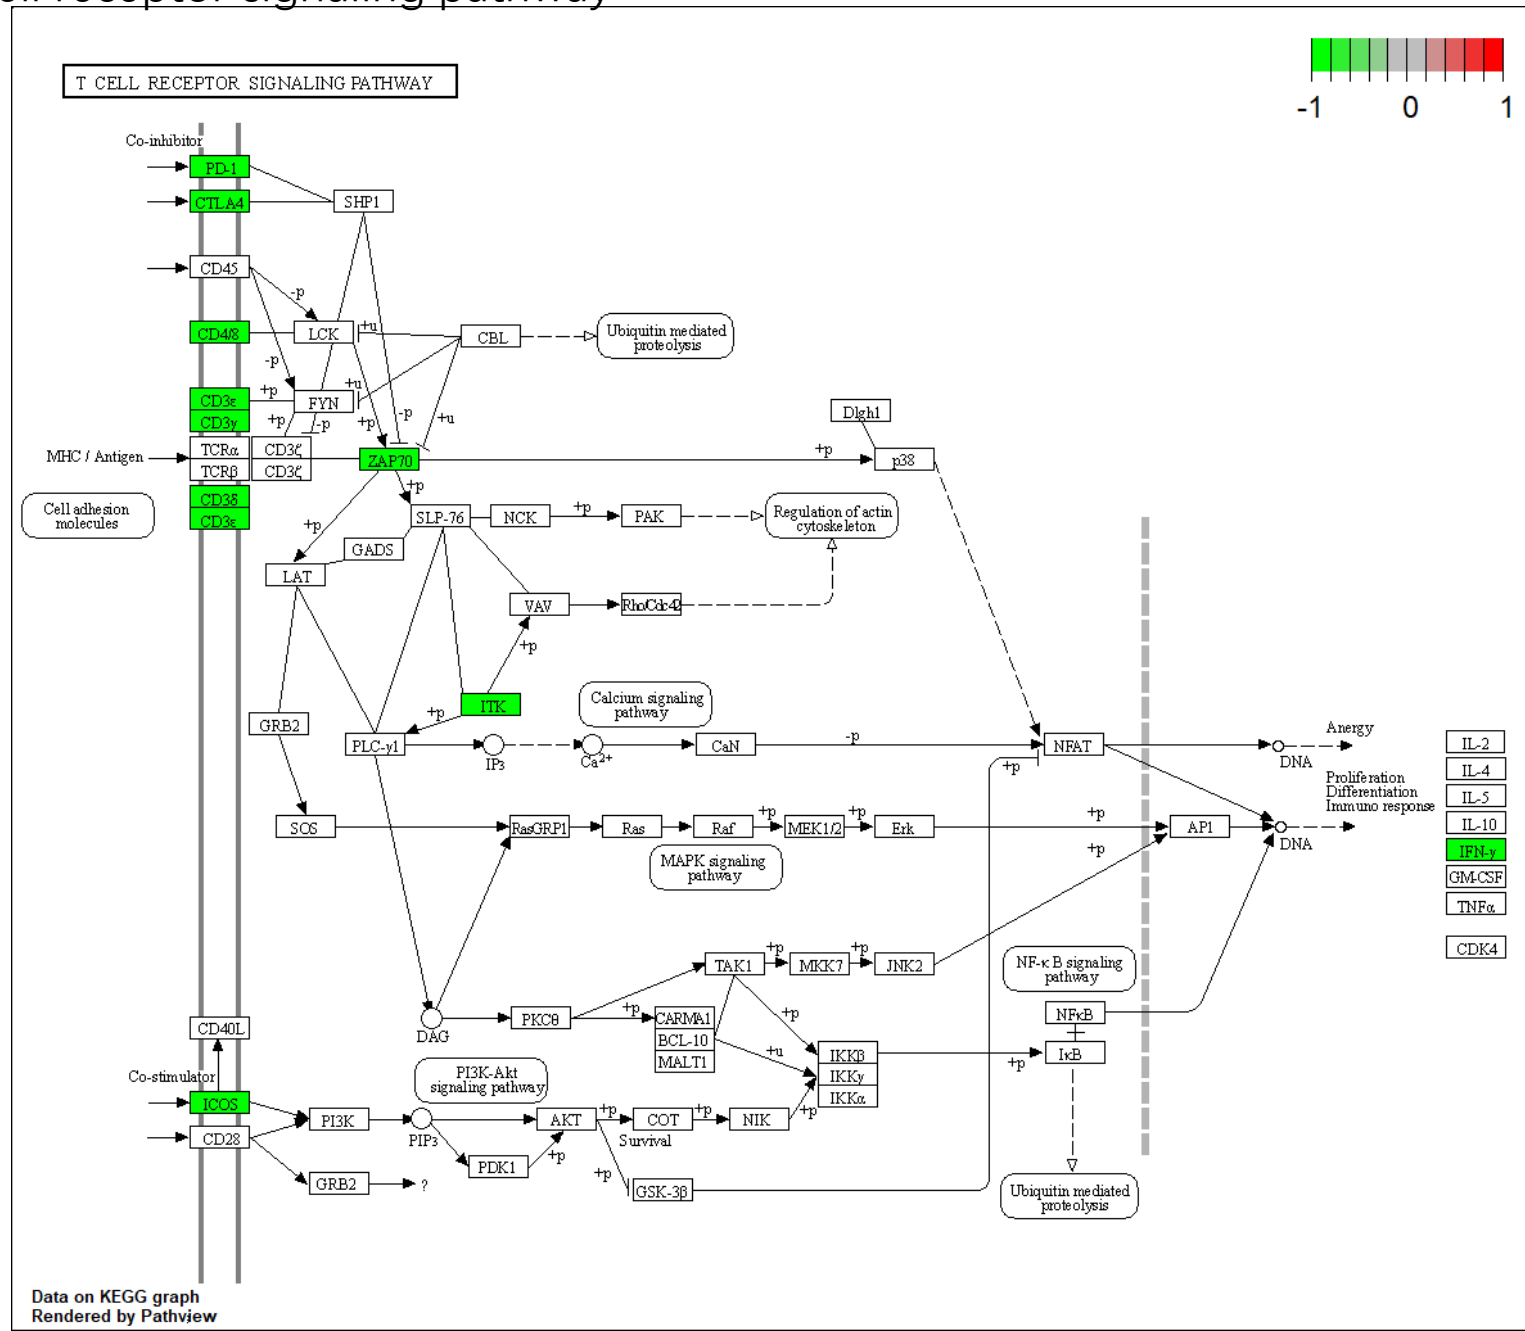

# S12. Intestinal immune network for IgA production pathway

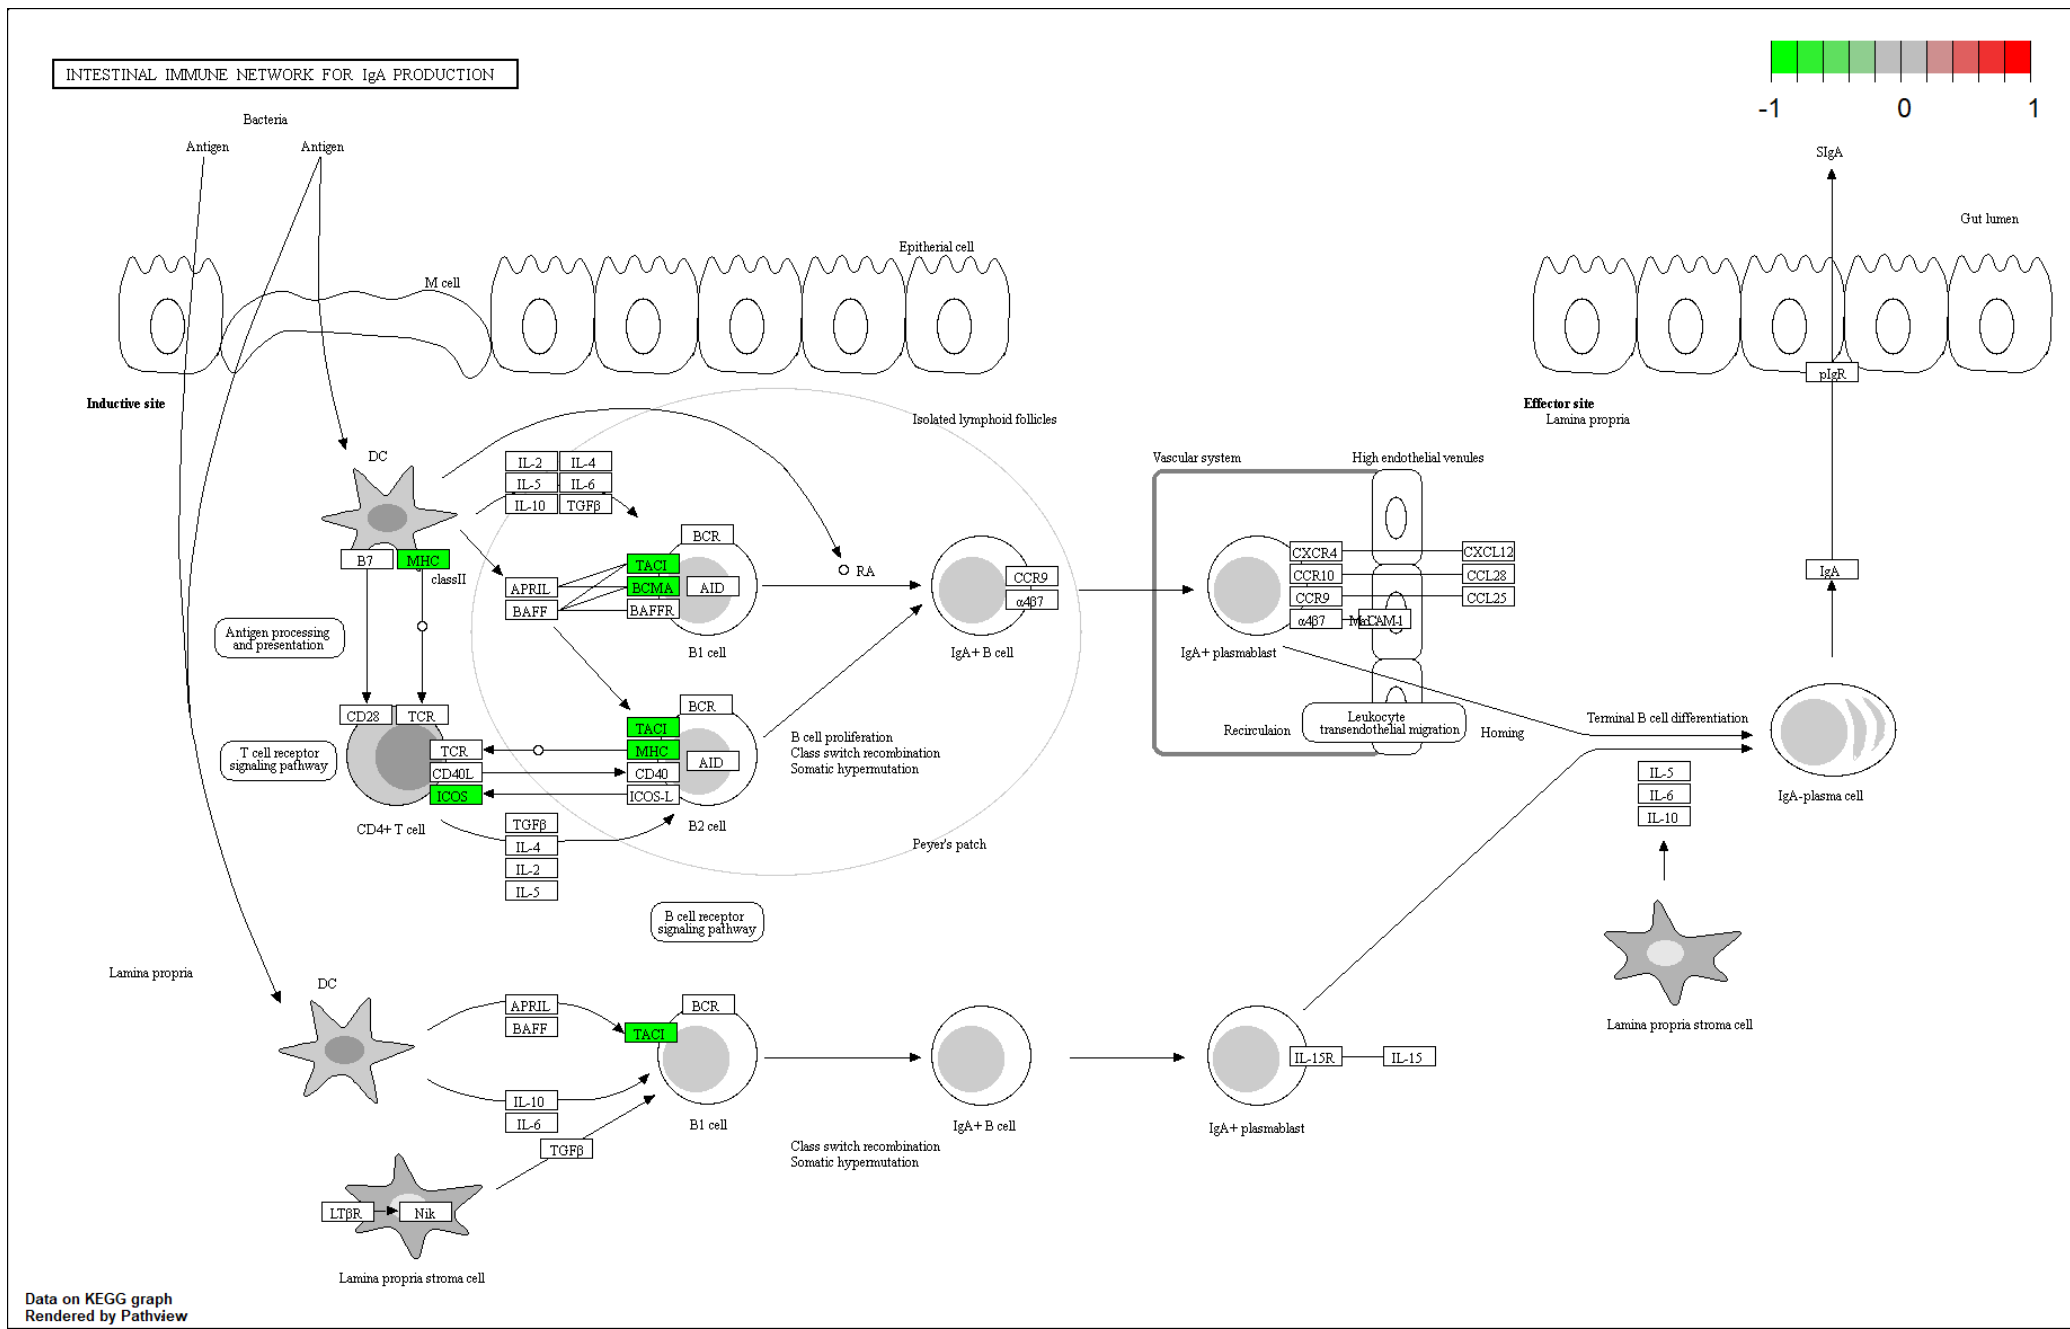

# S13. Type I diabetes mellitus pathway

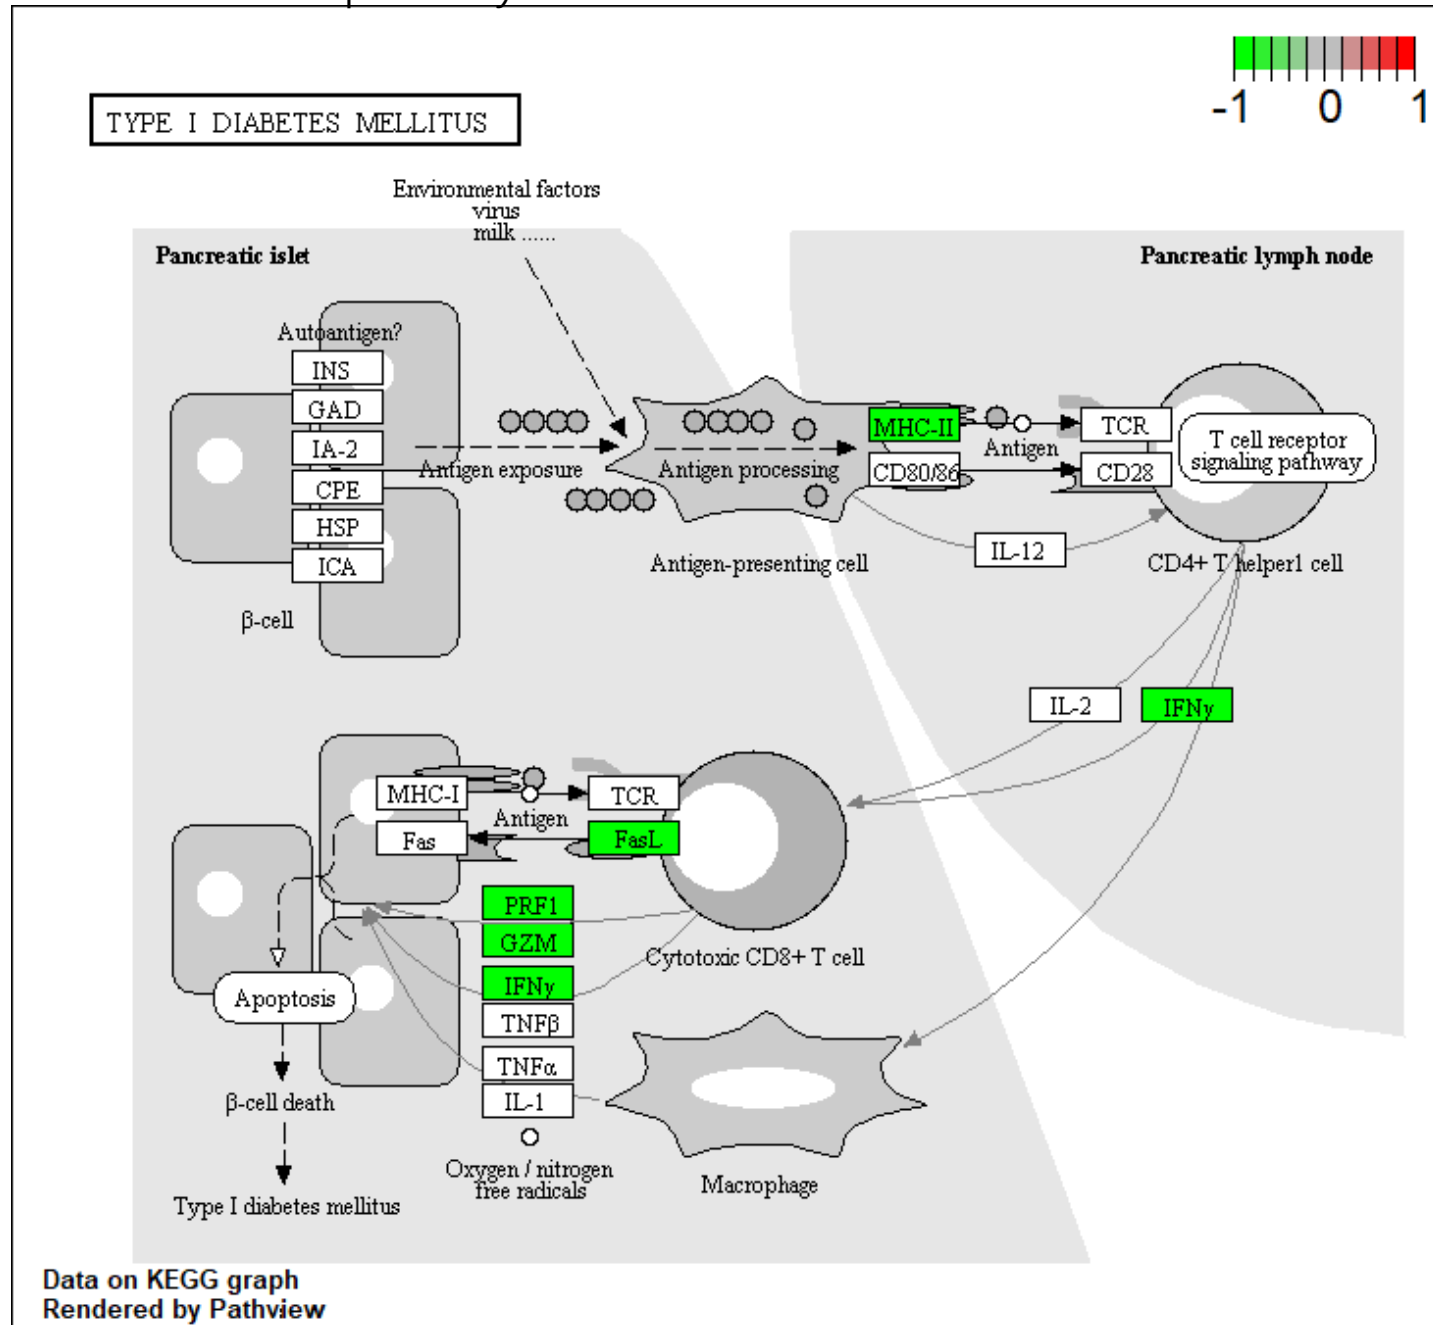

# S14. African trypanosomiasis pathway

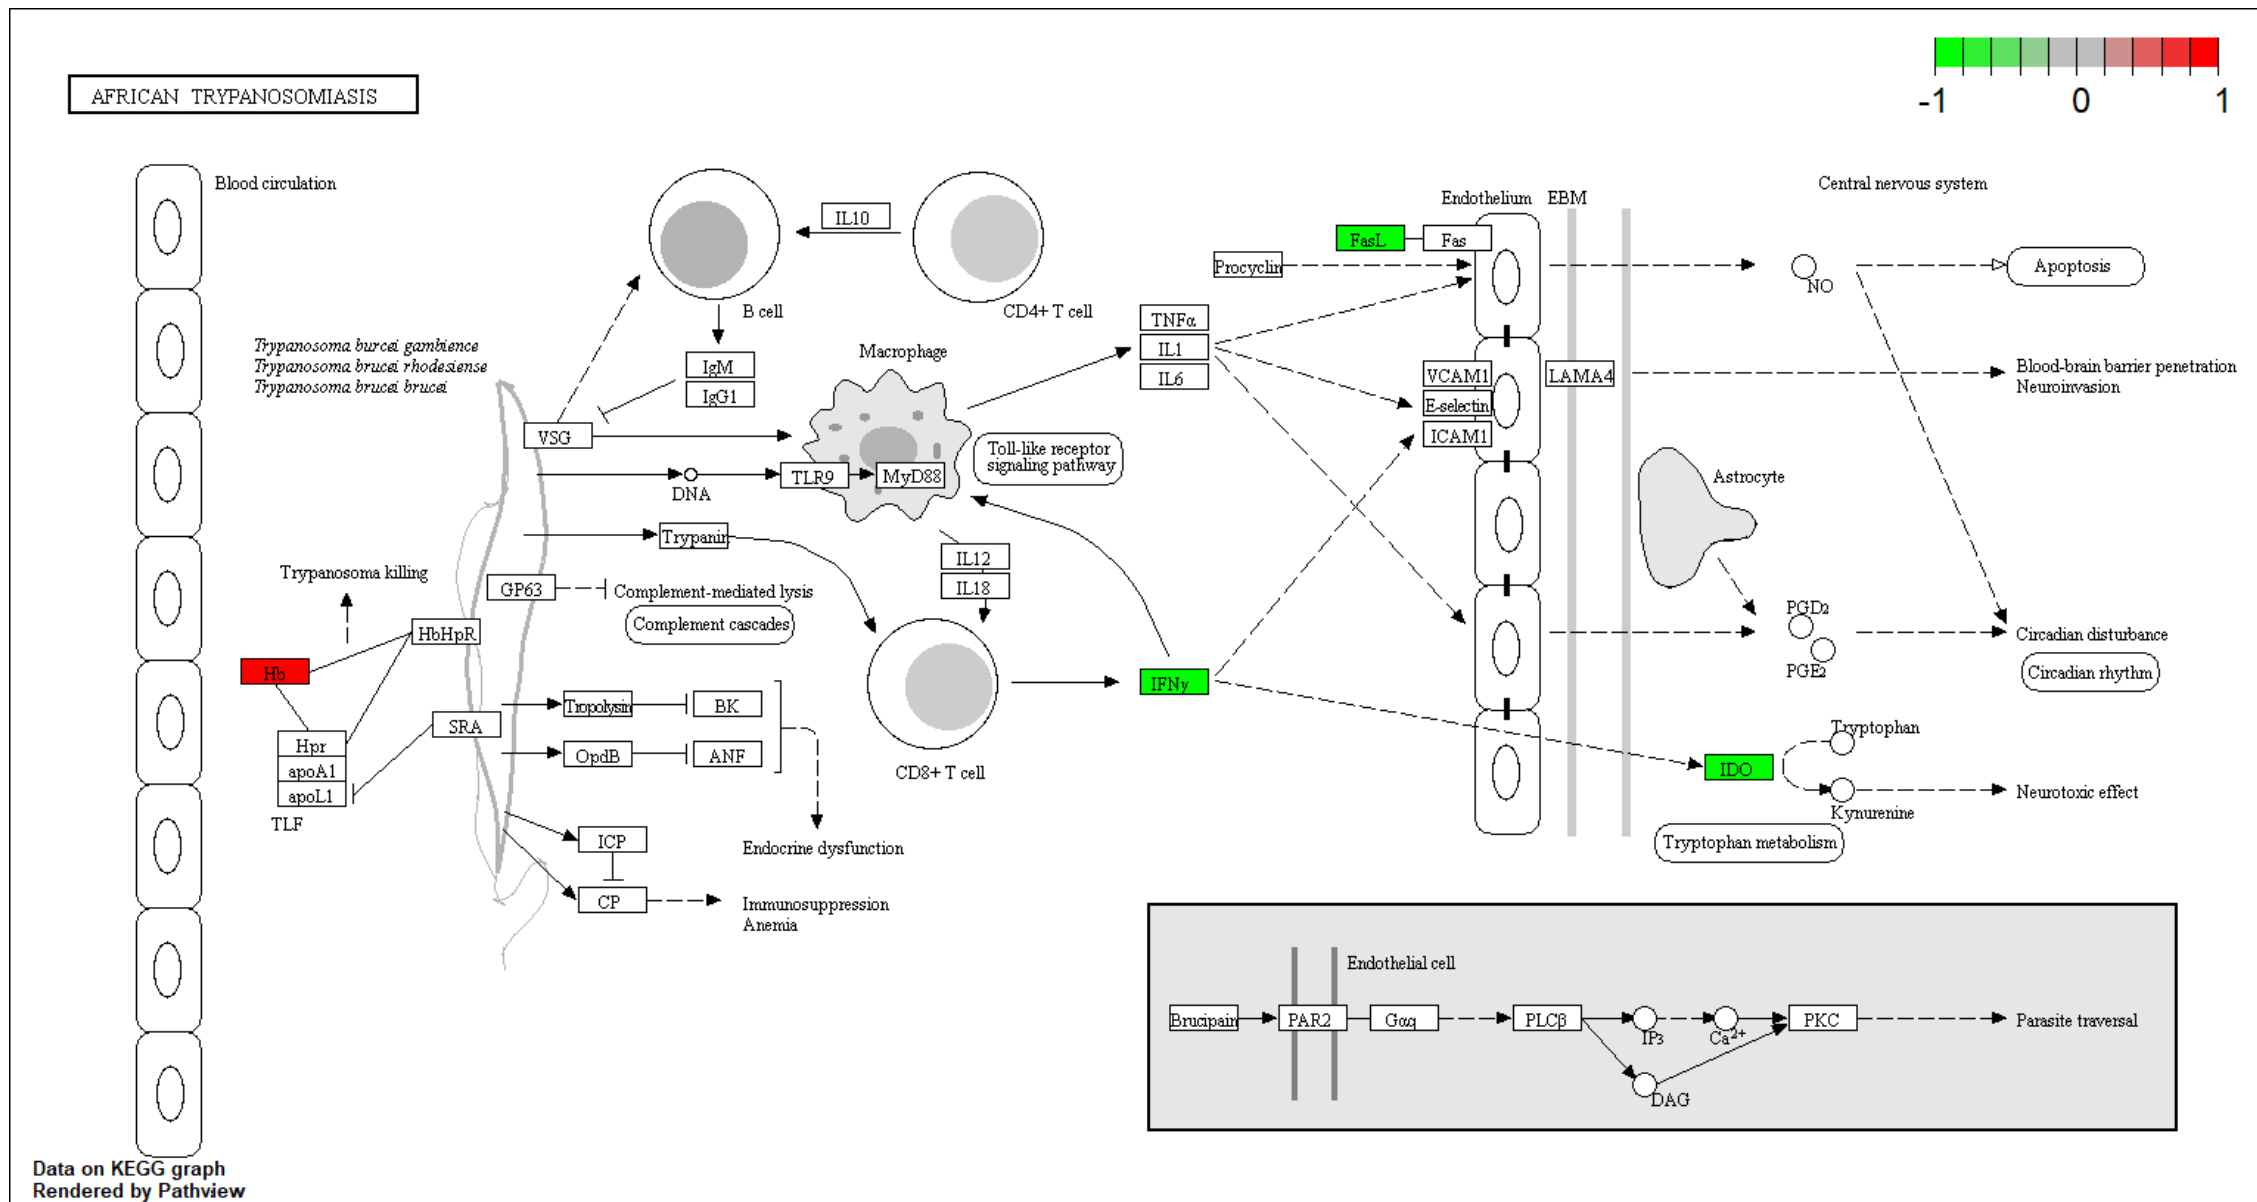

# S15. PD-L1 expression and PD-1 checkpoint pathway in cancer

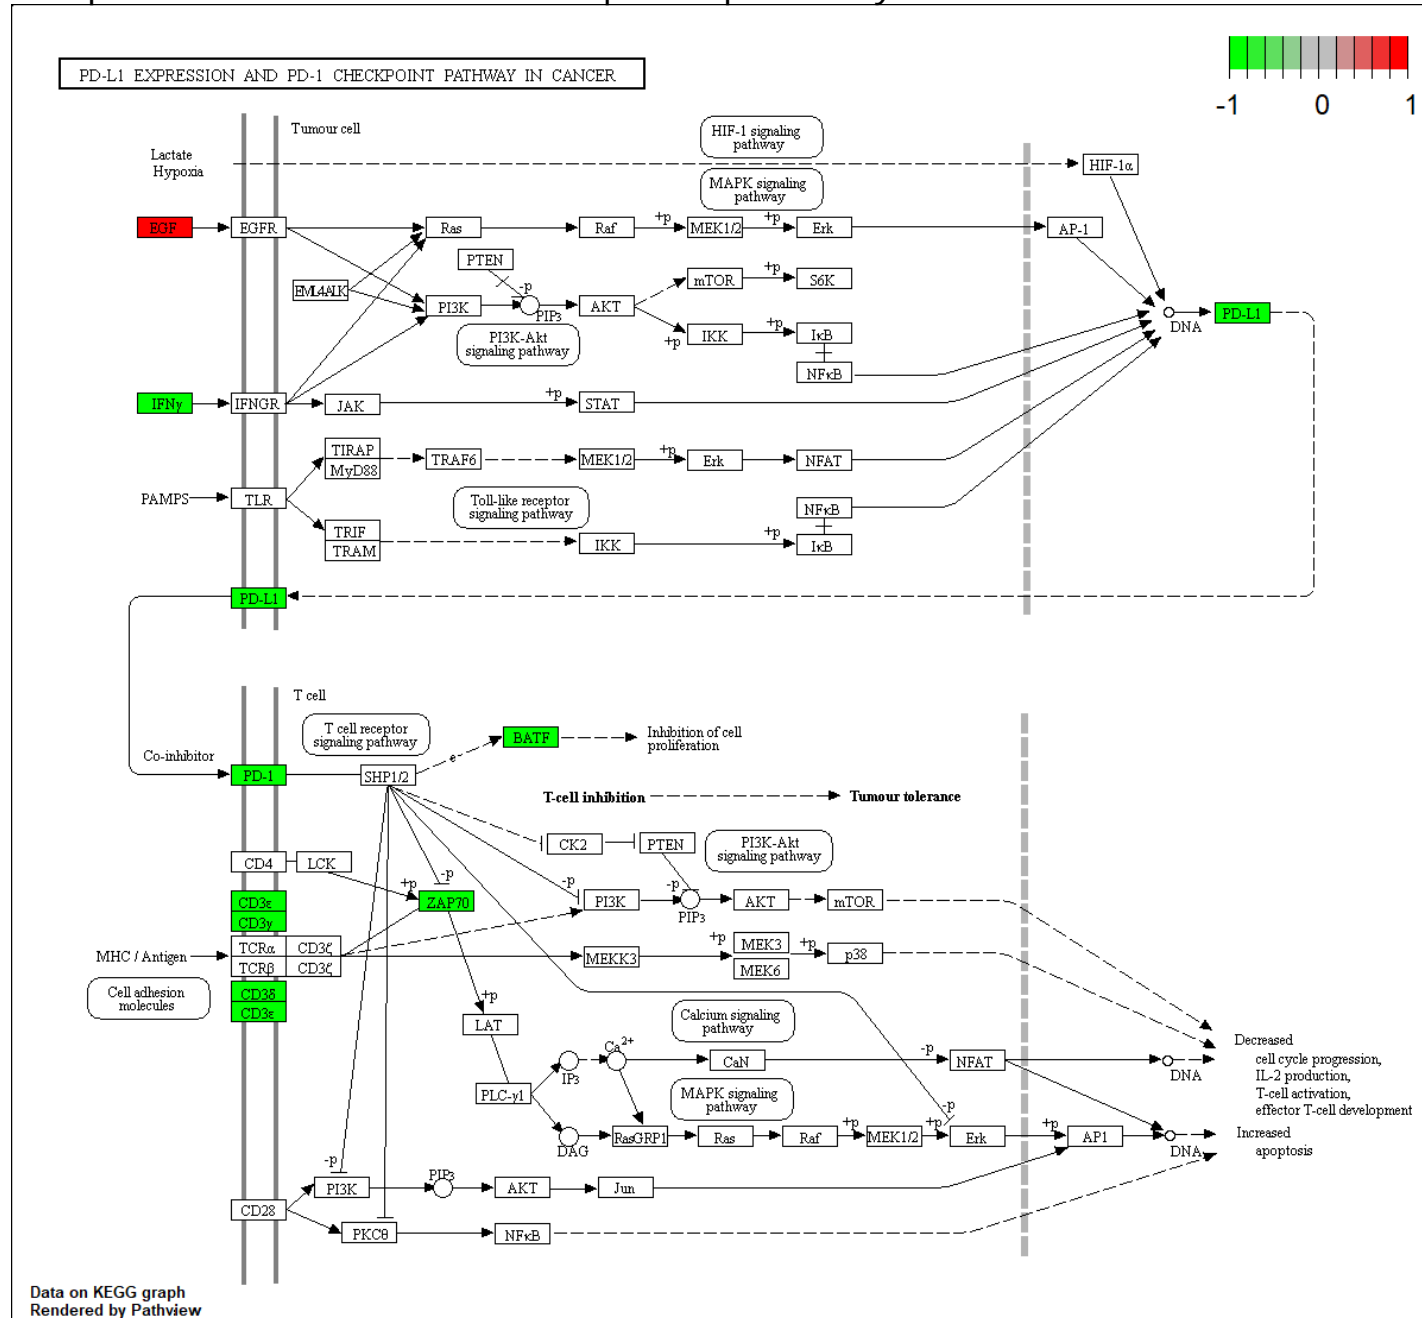

# S16. Autoimmune thyroid disease pathway

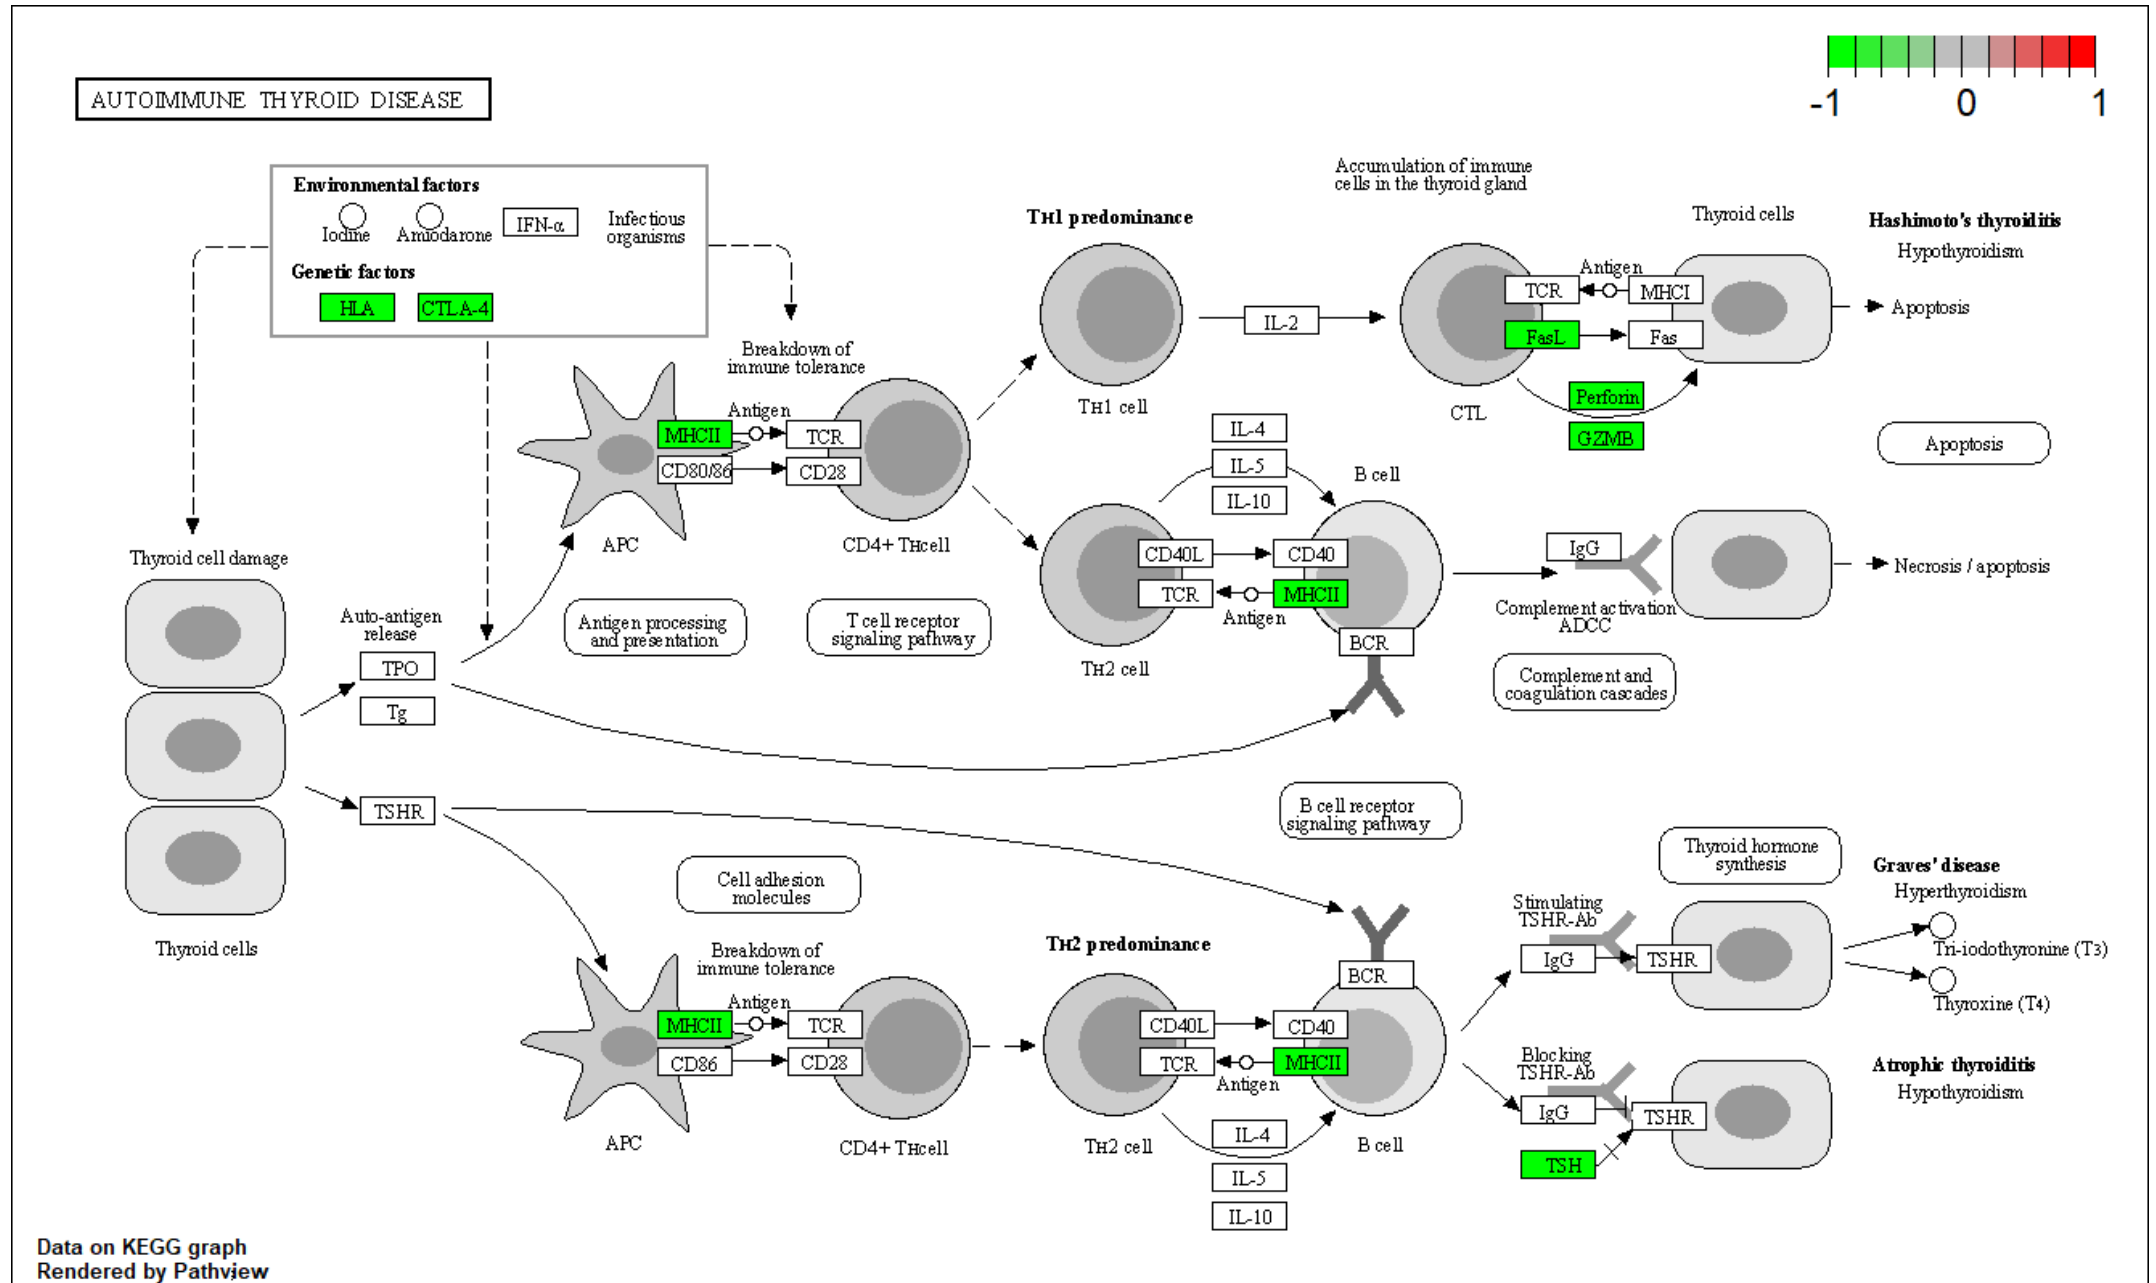



# S17. Inflammatory bowel disease pathway

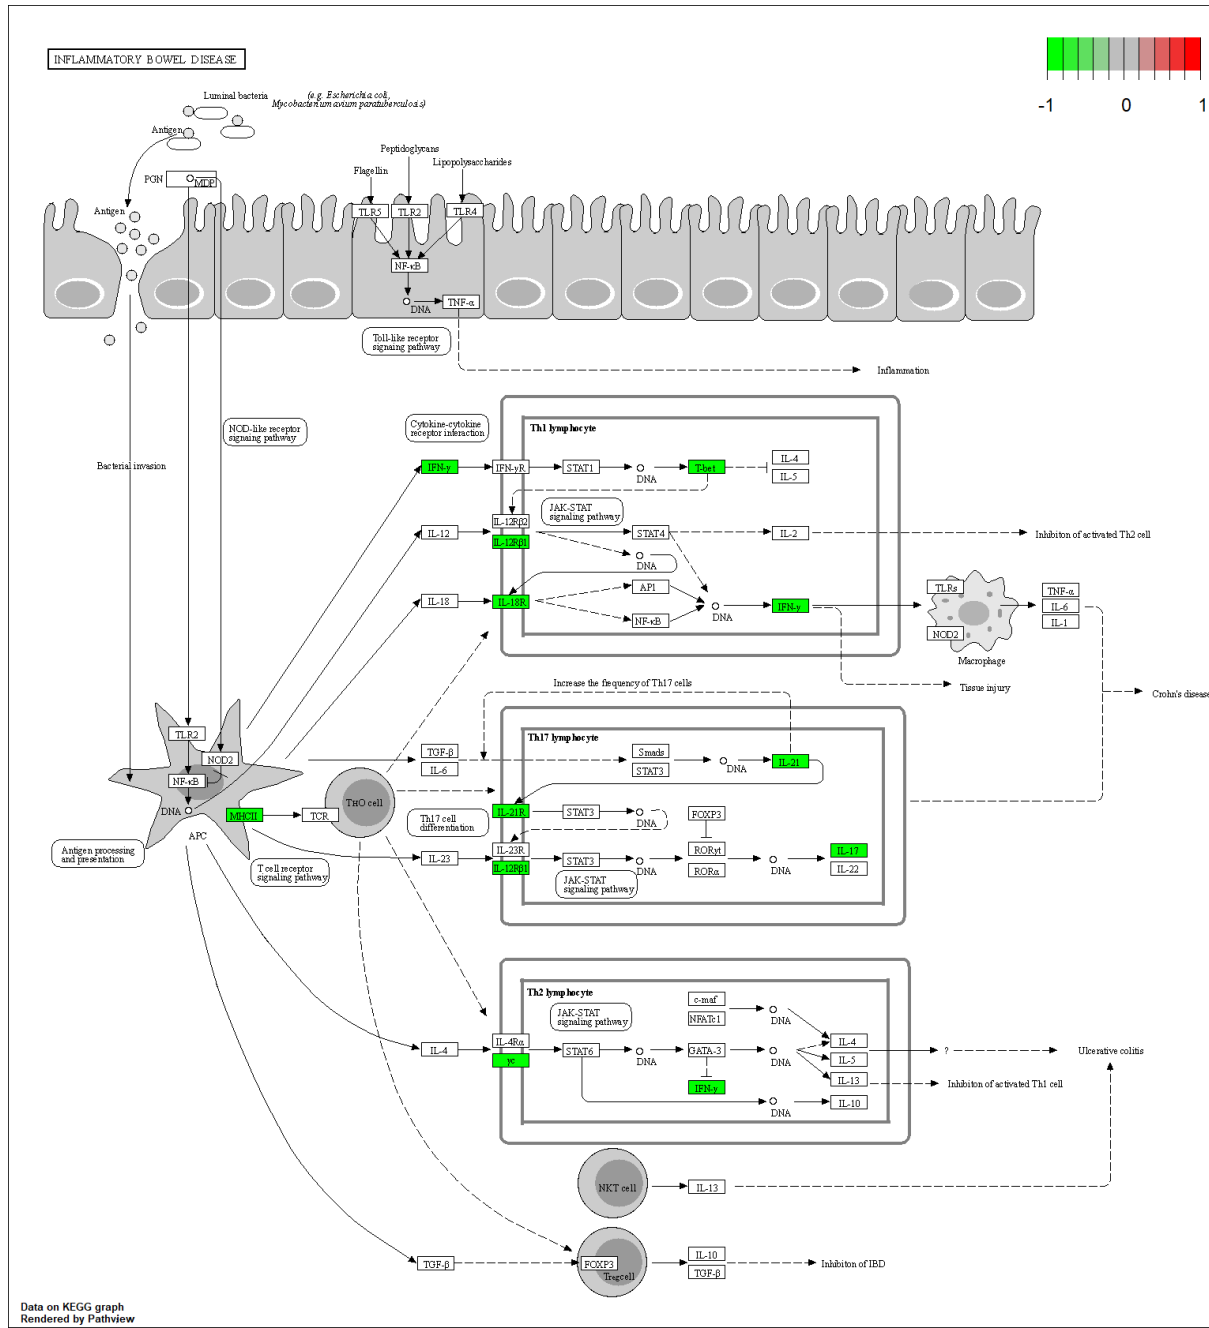

# S18. Rheumatoid arthritis pathway

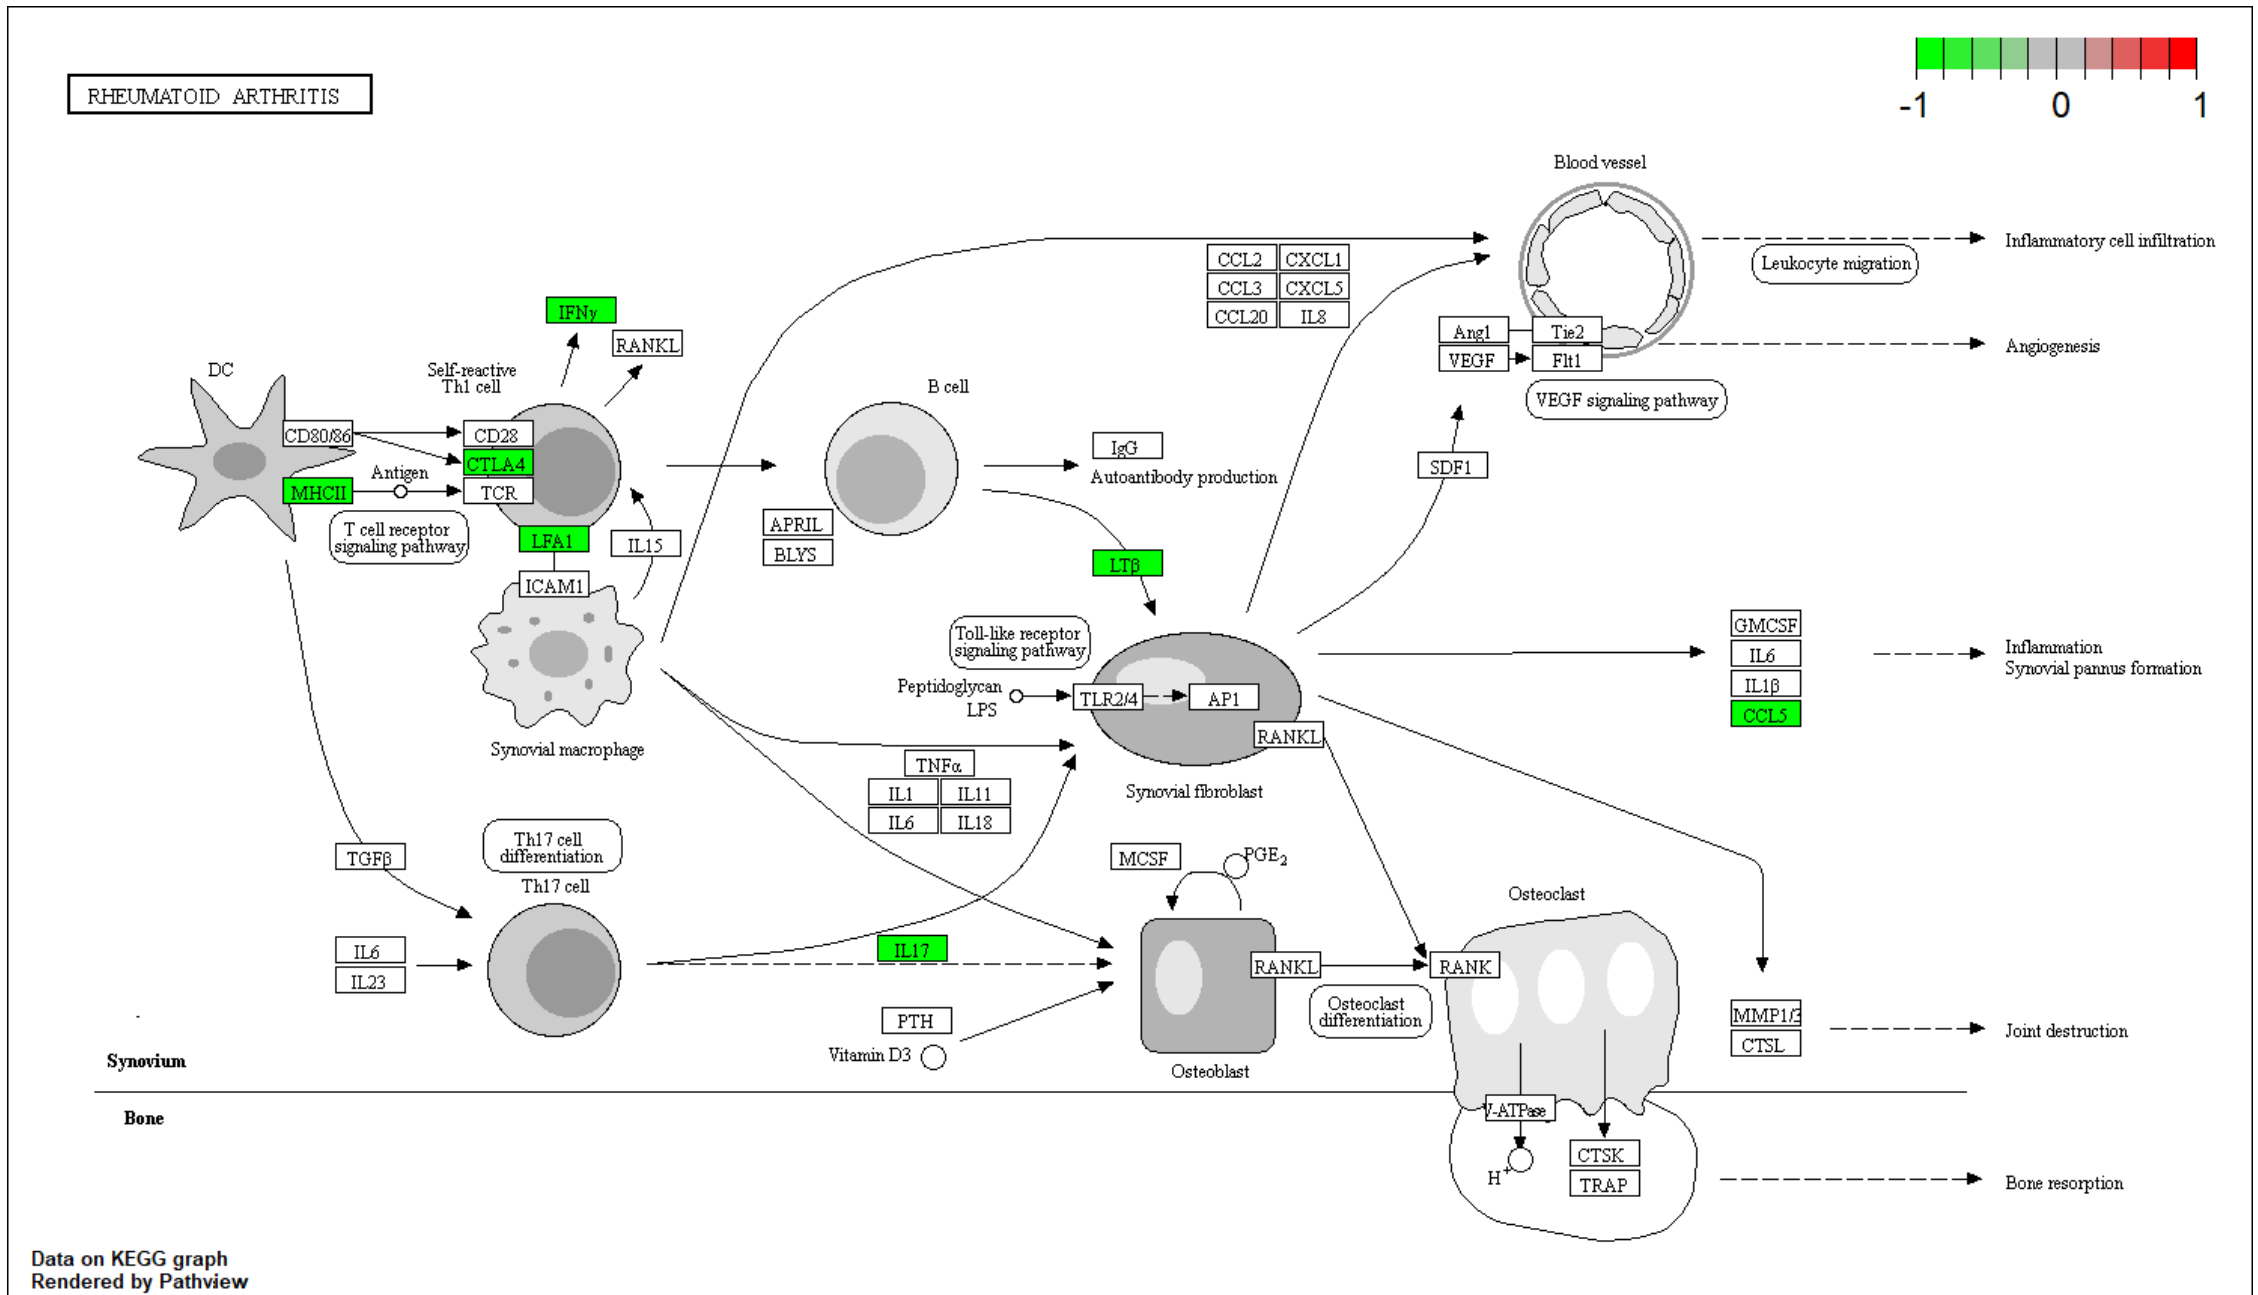

# S19. Allograft rejection pathway

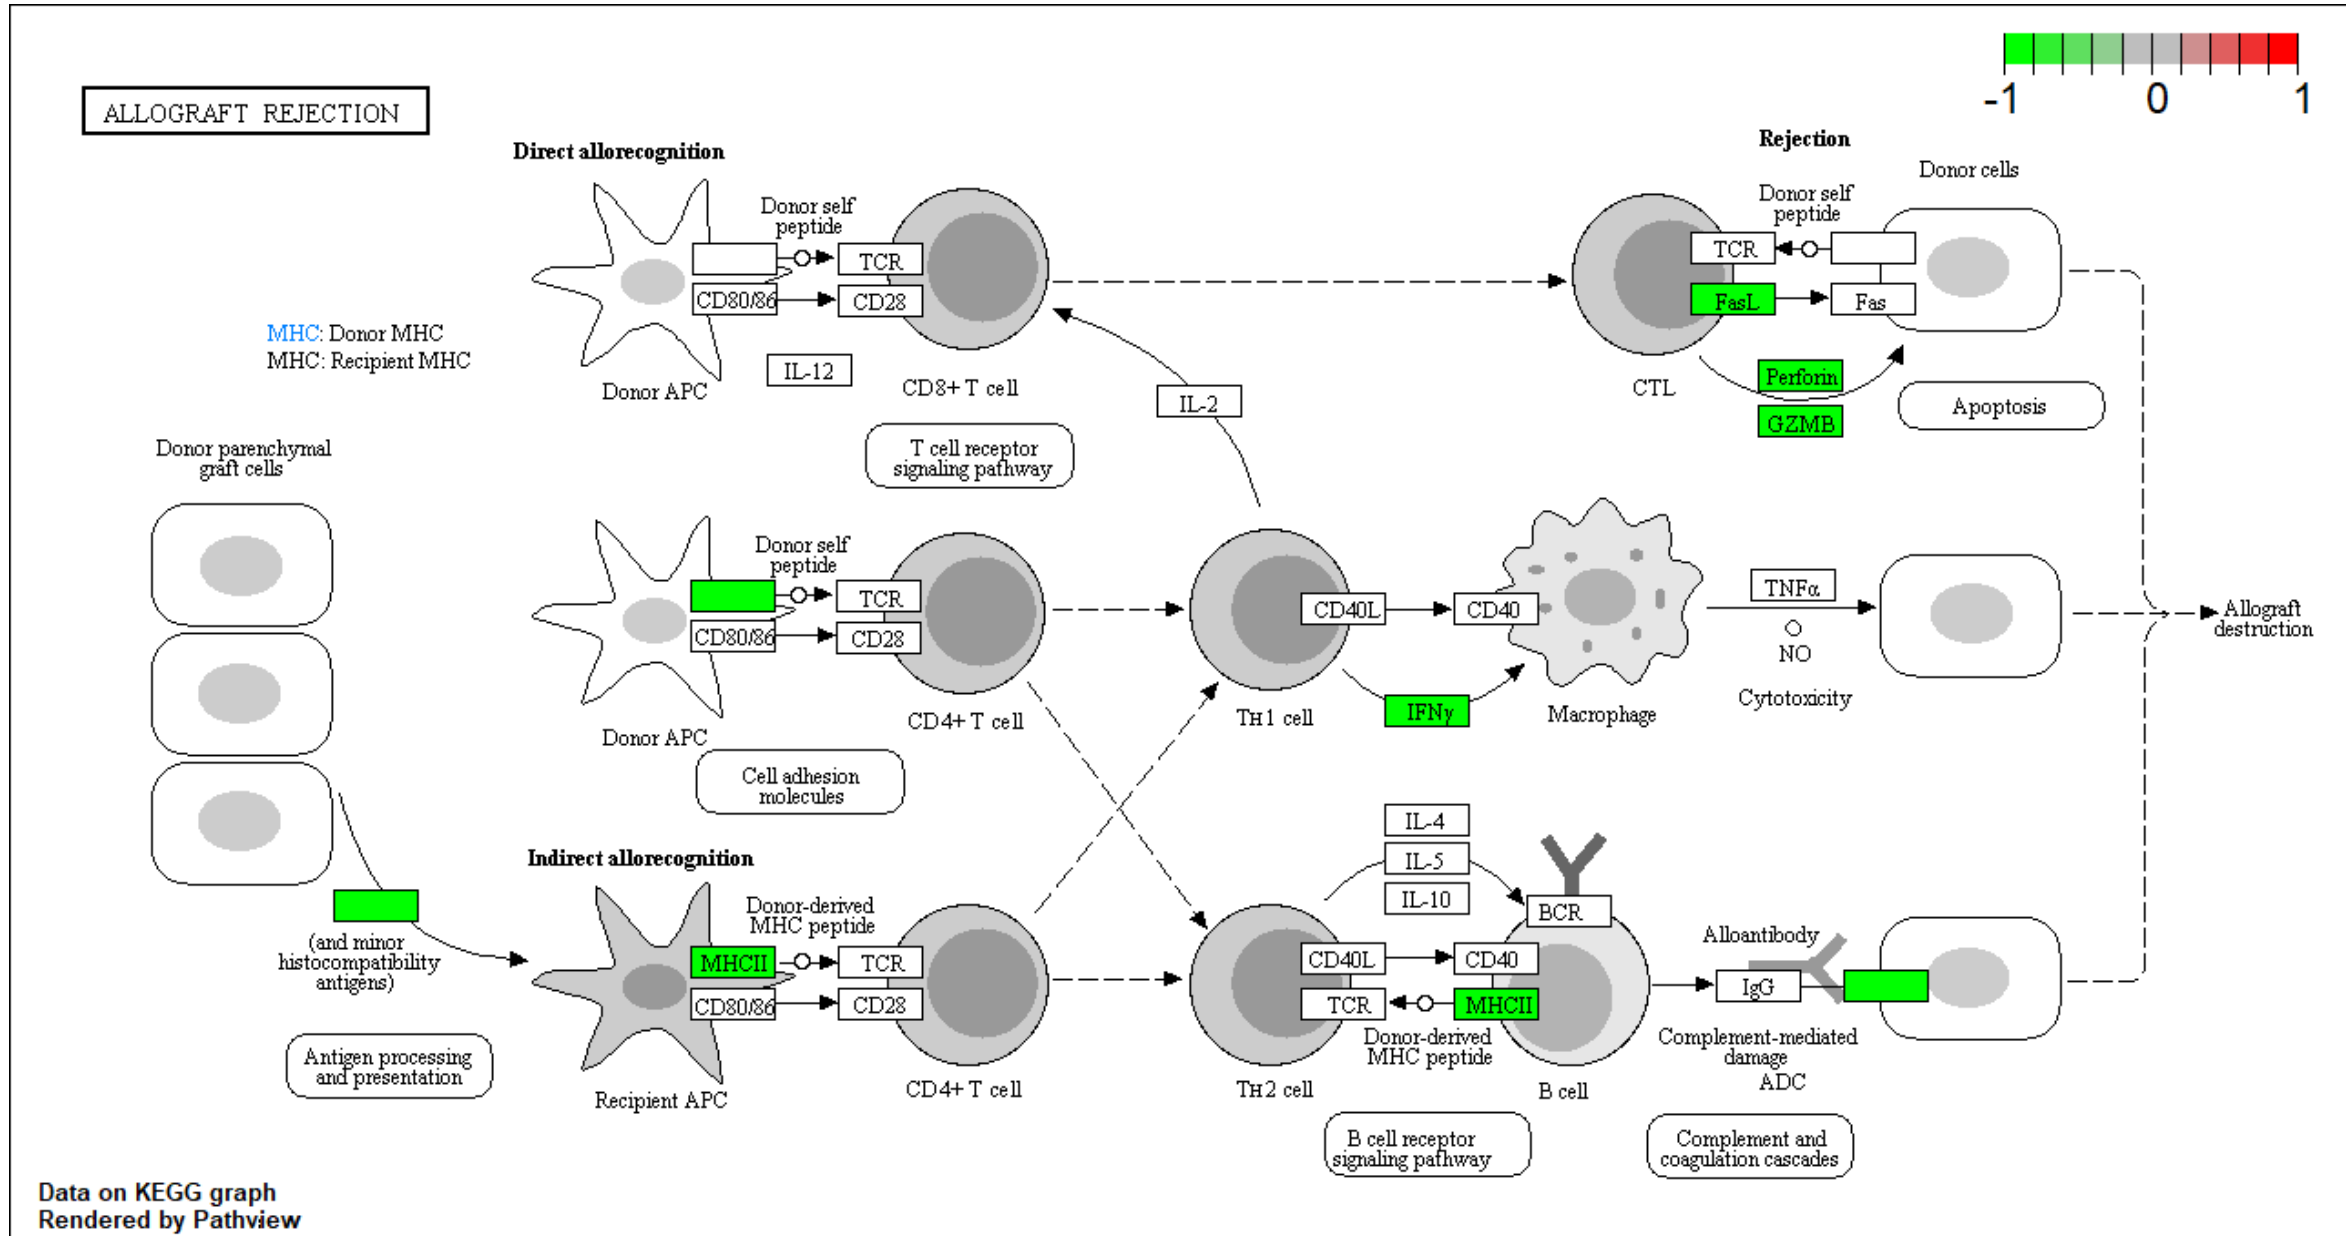

# S20. Graft-versus-host disease pathway

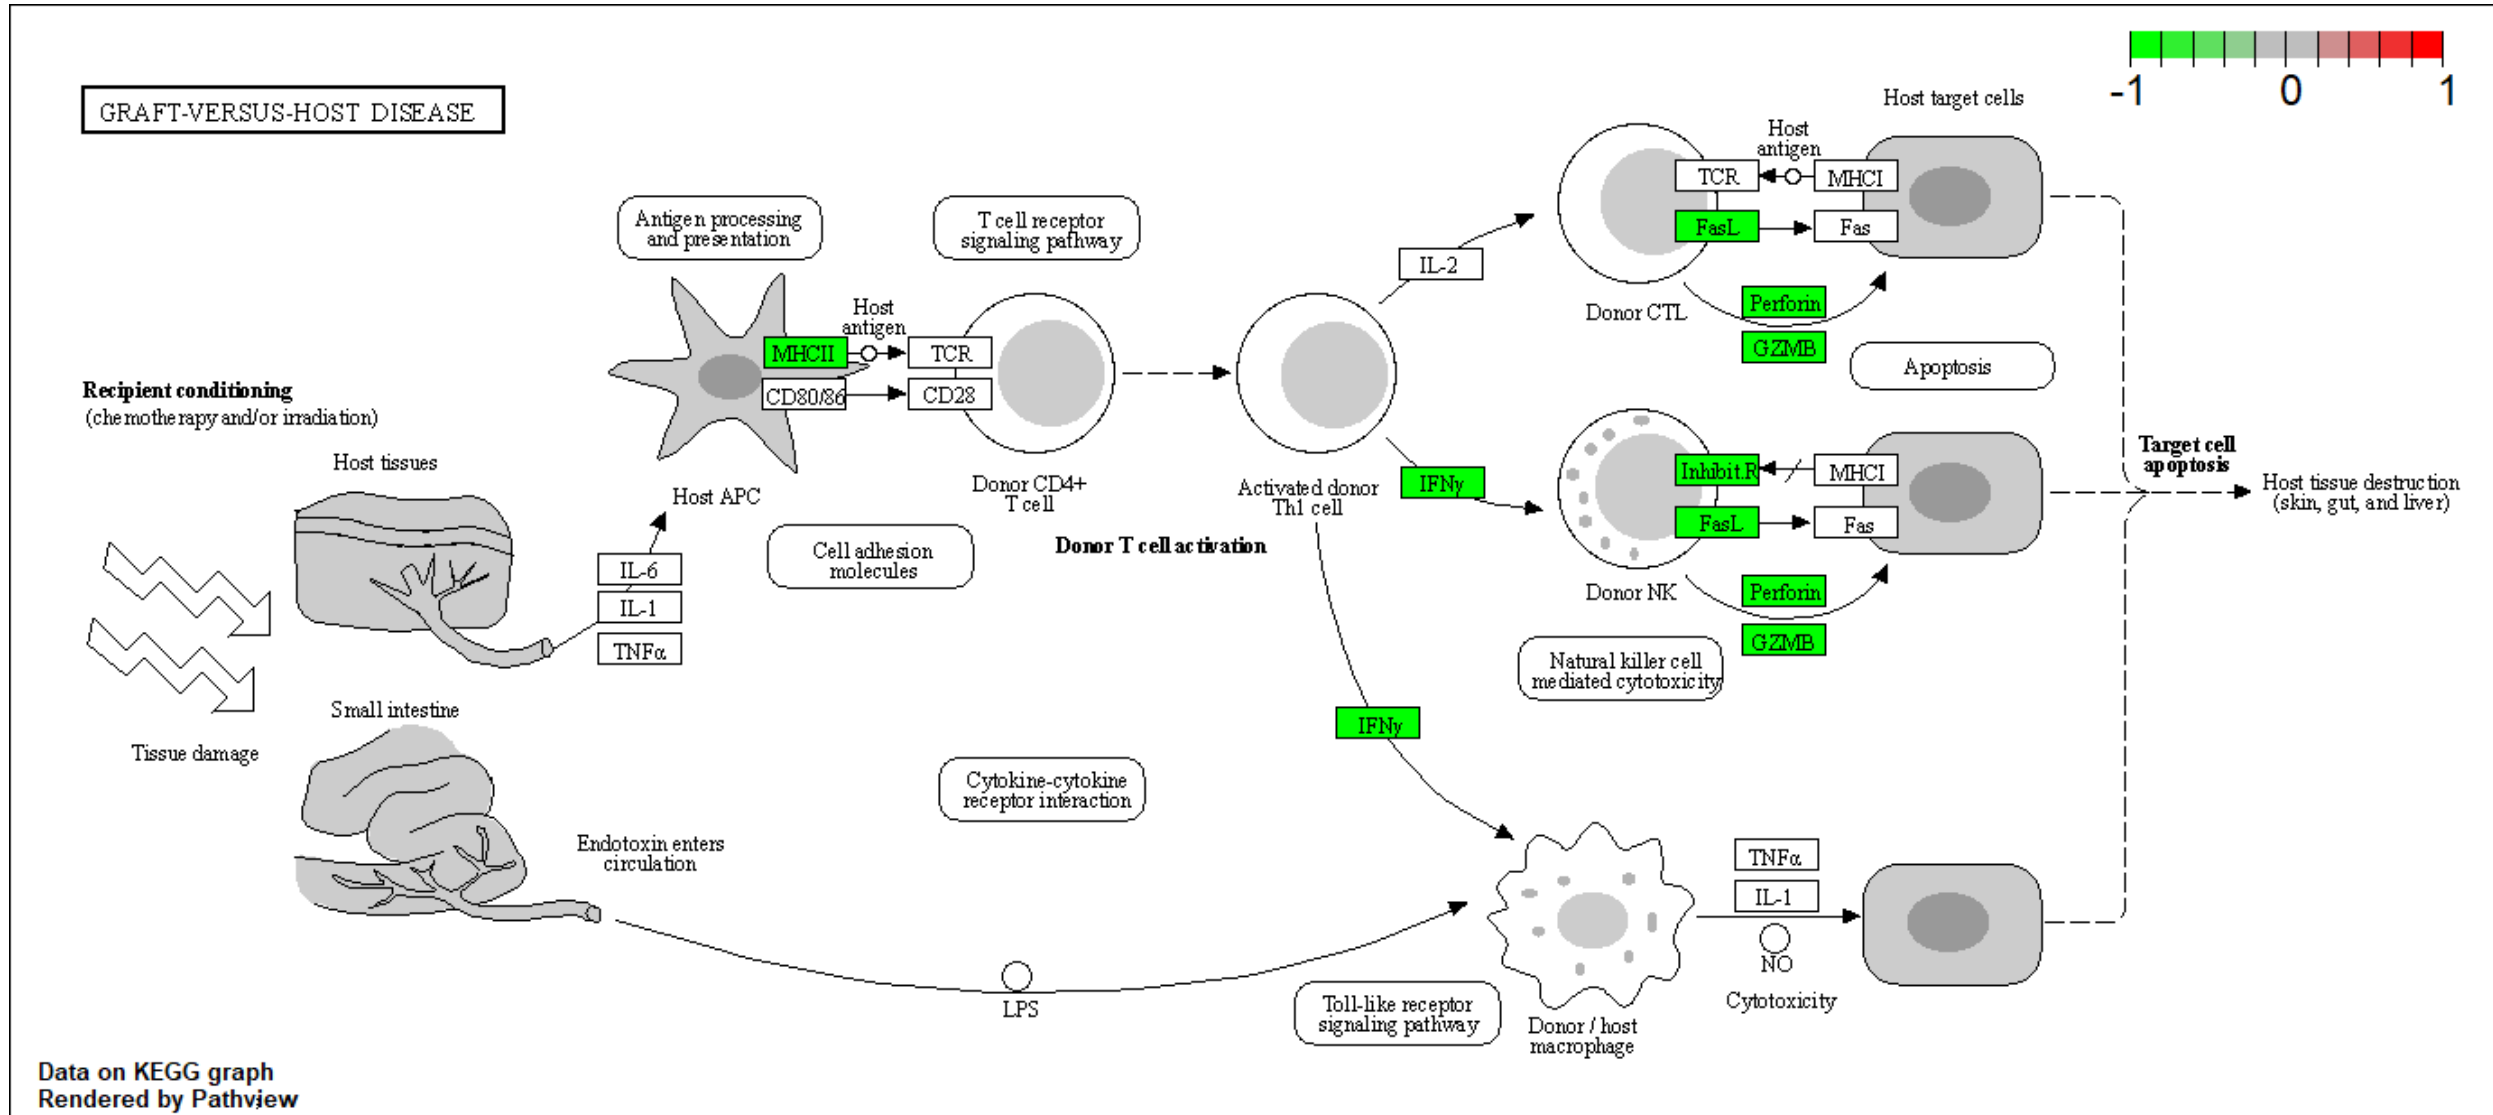

# S21. Primary immunodeficiency pathway

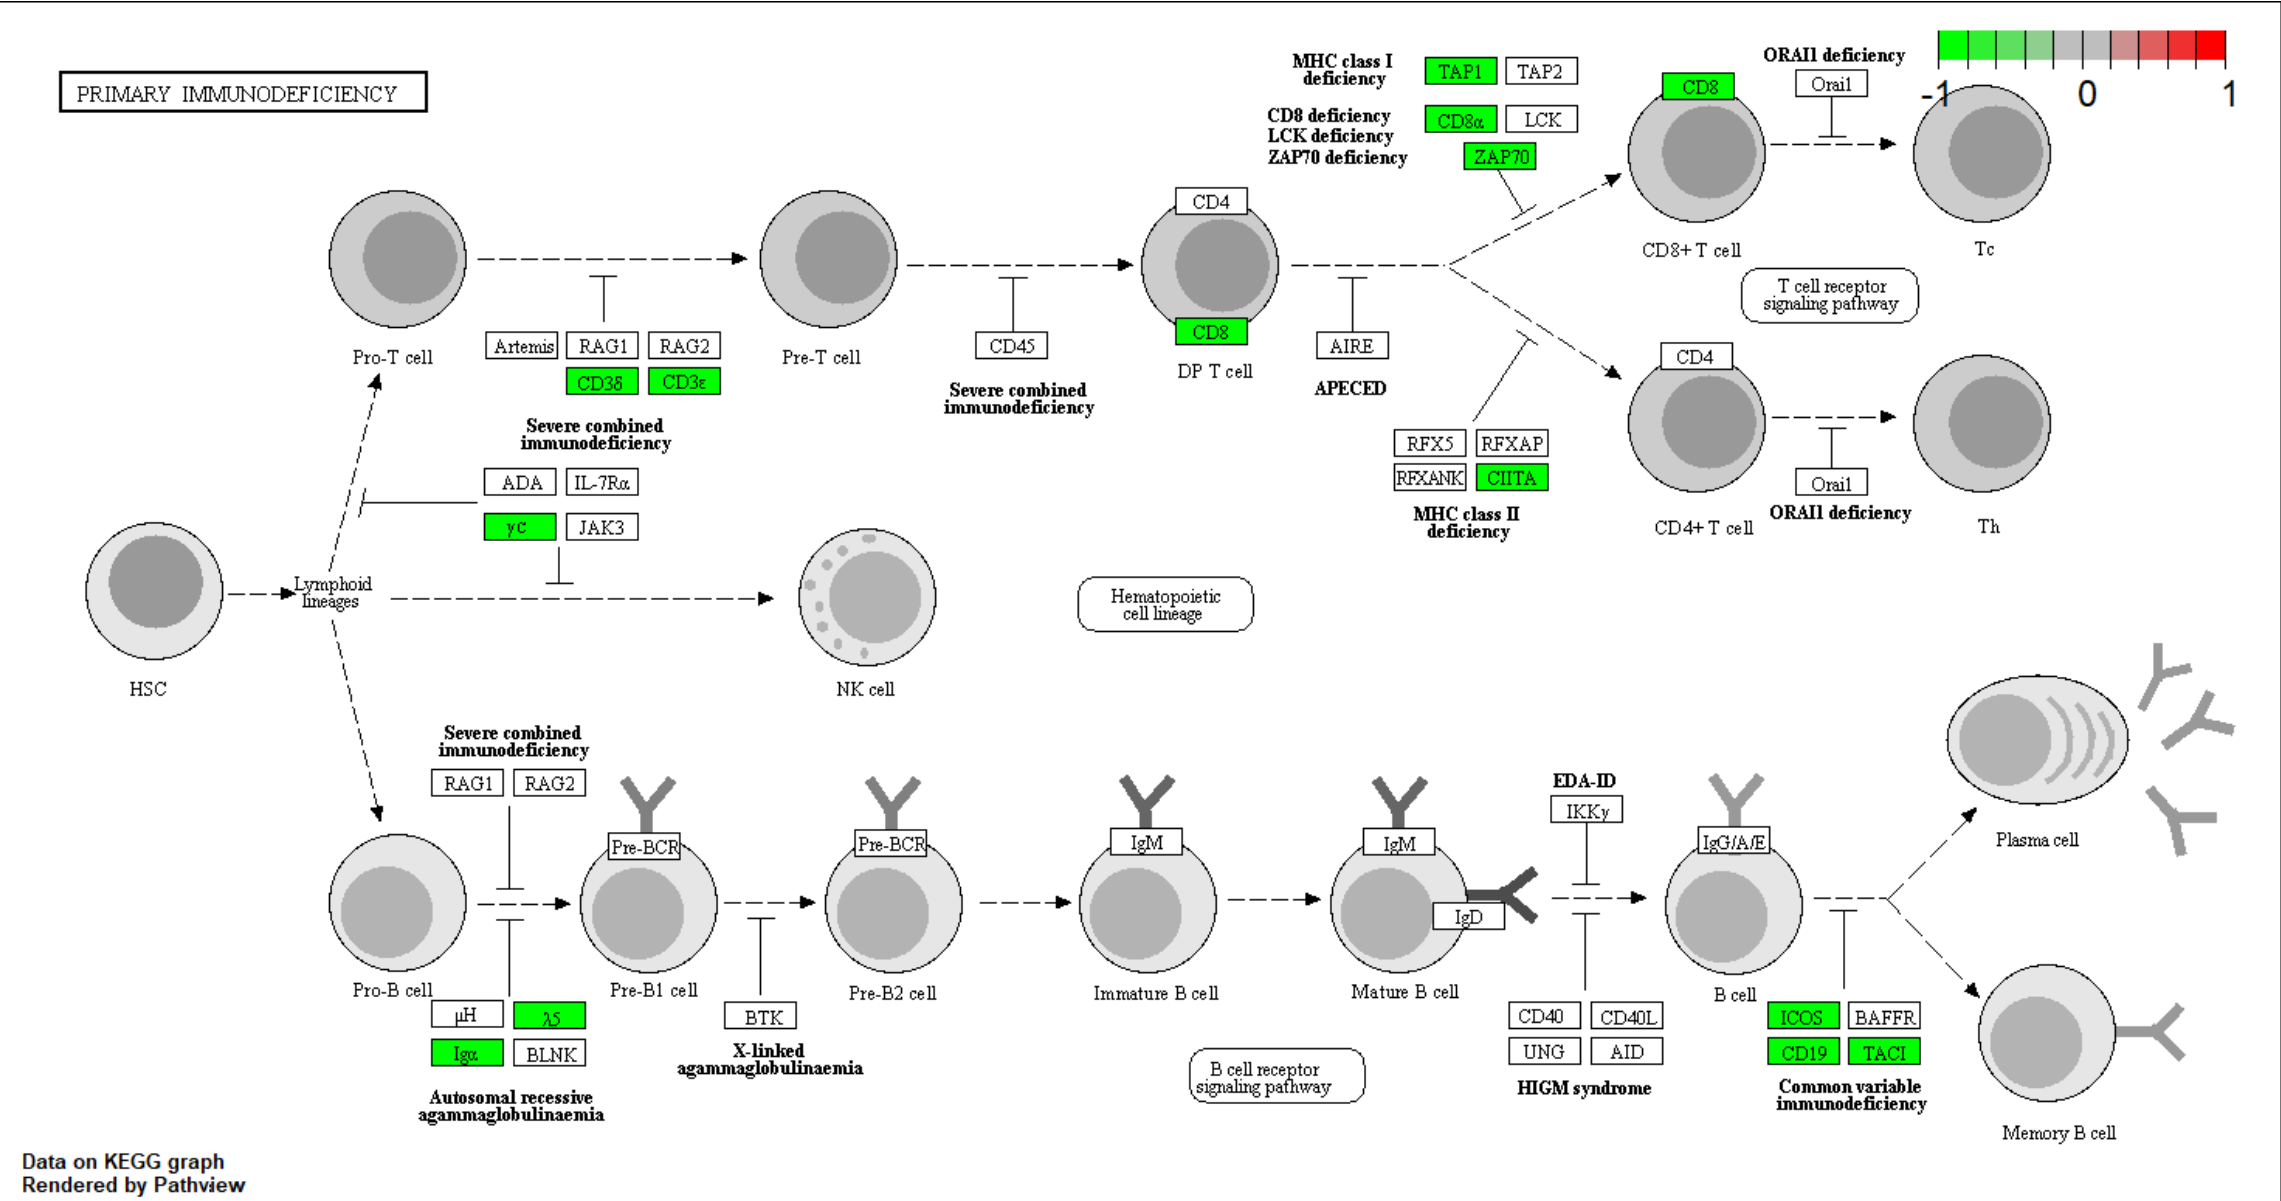

## S22. Viral myocarditis pathway

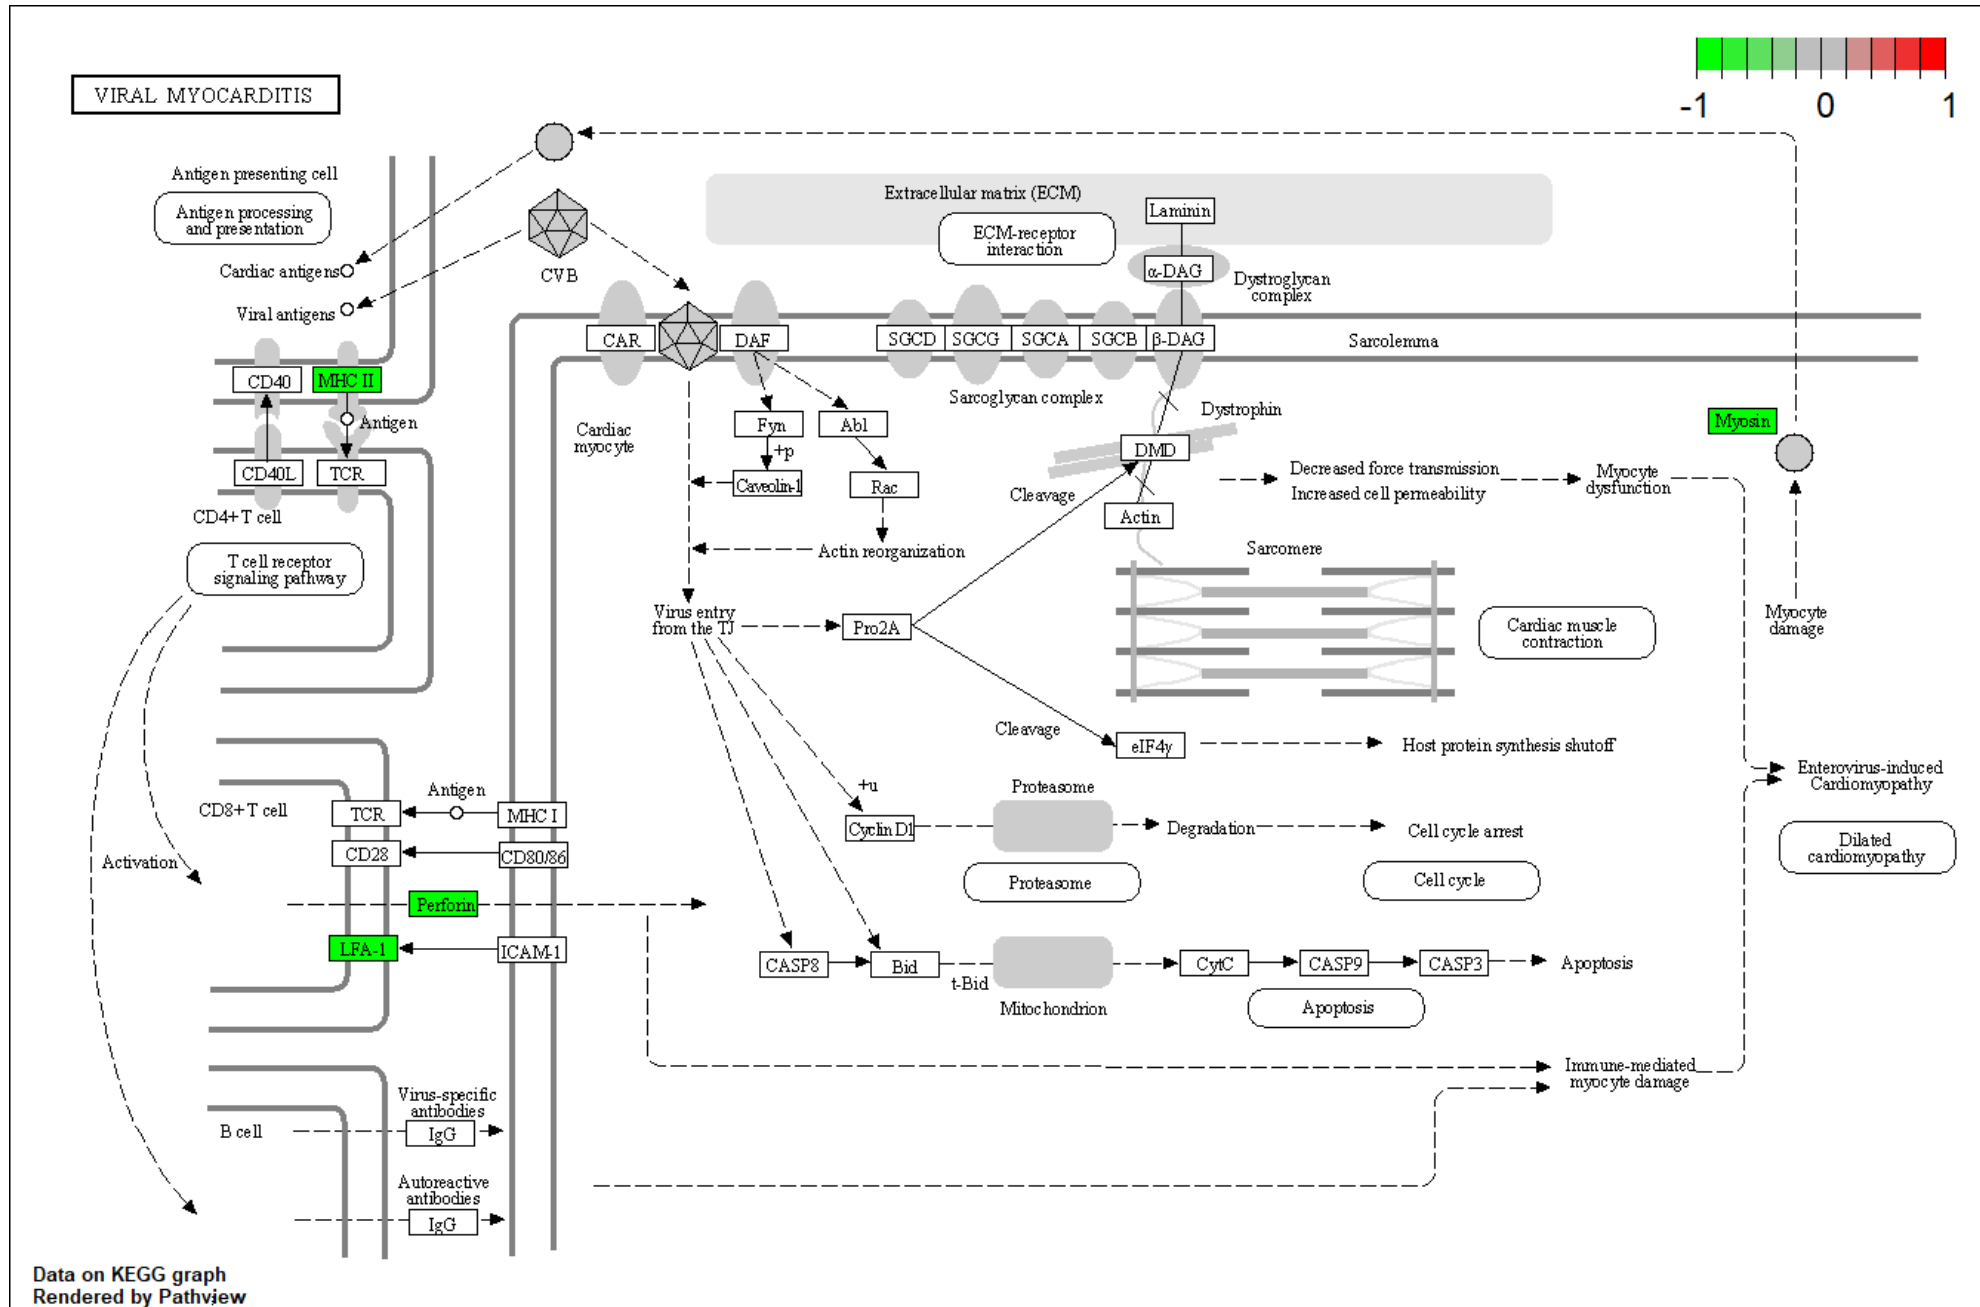

## S23. Gene sets enriched in GSEA analysis

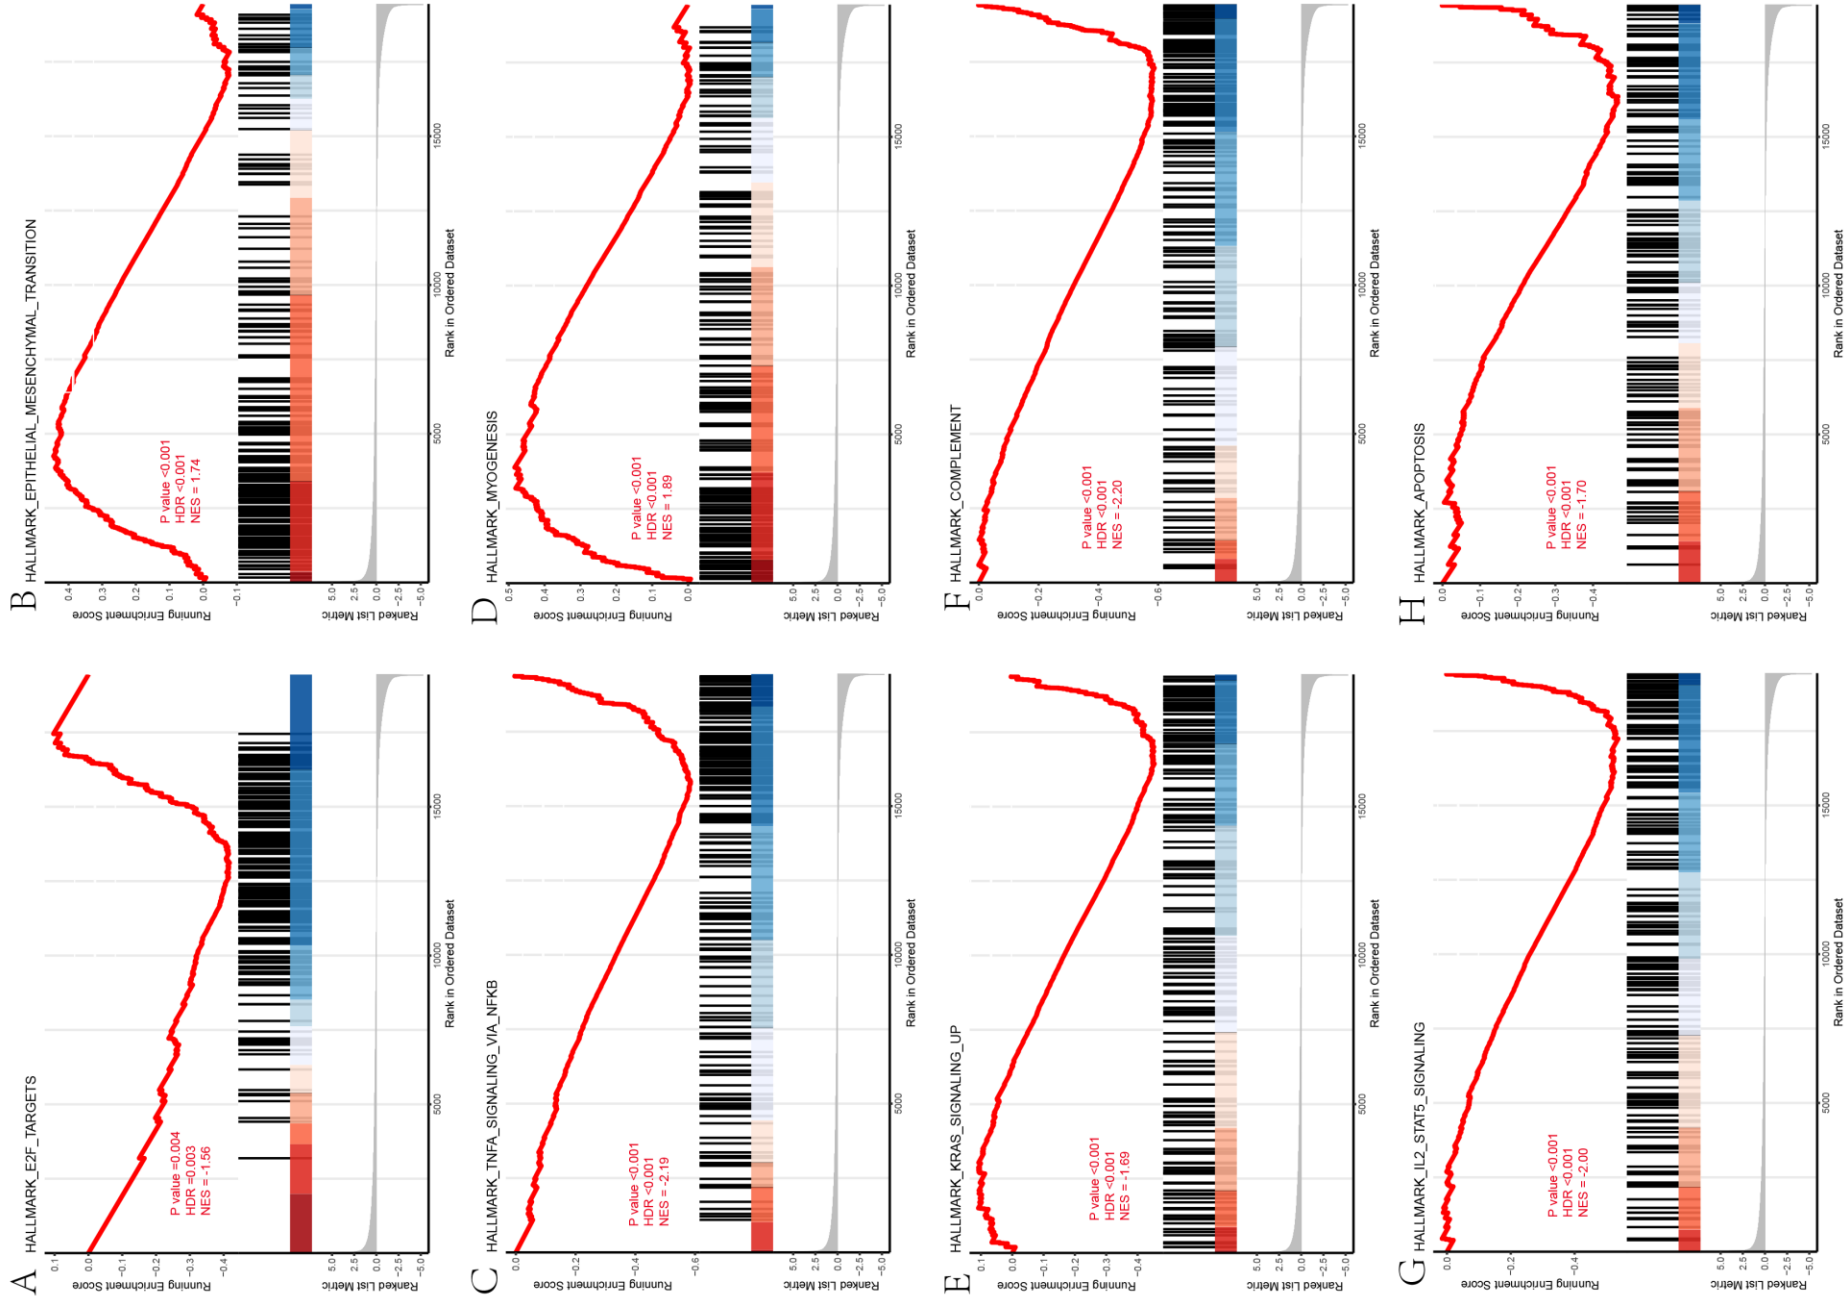

Supplement: 41065_2023_265_MOESM5_ESM.pdf [file 41065_2023_265_MOESM5_ESM.pdf]
